# Supplementary material for: A method to predict both the relaxation time of quantum tunneling of magnetization and the effective barrier of magnetic reversal for a Kramers single-ion magnet
Source: Royal Society of Chemistry journal article supplement (doi:10.1039/d0cp00933d), 2020-01-01
Supplement: d0cp00933d1.pdf [file d0cp00933d1.pdf]

# **A method to predict both relaxation time of quantum tunneling of magnetization and effective barrier of magnetic reversal for Kramers single-ion magnet**

Bing Yin,\* and Chao-Chao Li

MOE Key Laboratory of Synthetic and Natural Functional Molecule, College of Chemistry and  
Materials Science, Northwest University, Xi'an, 710127, P. R. China.

E-mail: rayinyin@nwu.edu.cn

RAPDUK (CCDC REFCODE)

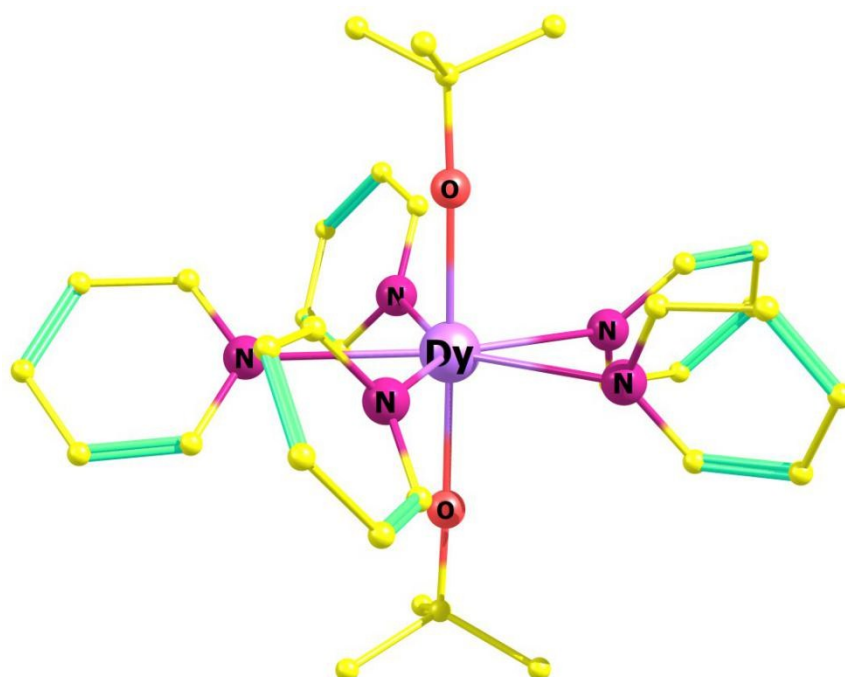

|    |              |              |             |
|----|--------------|--------------|-------------|
| Dy | 0.805083000  | 5.192257000  | 4.302267000 |
| O  | -0.712137000 | 5.618522000  | 5.710925000 |
| O  | 2.332843000  | 4.737363000  | 2.920038000 |
| N  | -0.226225000 | 2.893051000  | 4.031407000 |
| N  | 2.361653000  | 6.669972000  | 5.690306000 |
| N  | 0.597273000  | 7.592639000  | 3.428392000 |
| N  | -0.847367000 | 5.256465000  | 2.332394000 |
| N  | 2.038851000  | 3.676921000  | 5.986284000 |
| B  | 6.634377000  | 12.870950000 | 4.613052000 |

|   |              |              |             |
|---|--------------|--------------|-------------|
| C | -1.740840000 | 5.812896000  | 6.660340000 |
| C | -1.312339000 | 6.846882000  | 7.704041000 |
| C | -2.027857000 | 4.501258000  | 7.387257000 |
| C | -2.996447000 | 6.296317000  | 5.945795000 |
| C | 3.369437000  | 4.393887000  | 2.023295000 |
| C | 3.079728000  | 3.033979000  | 1.370232000 |
| C | 4.688015000  | 4.252926000  | 2.776079000 |
| C | 3.496303000  | 5.458855000  | 0.955976000 |
| C | 0.507744000  | 1.804993000  | 3.756423000 |
| C | 0.006133000  | 0.517562000  | 3.769544000 |
| C | -1.316388000 | 0.323345000  | 4.098887000 |
| C | -2.097025000 | 1.436436000  | 4.369372000 |
| C | -1.521535000 | 2.686972000  | 4.311826000 |
| C | 3.313122000  | 7.450742000  | 5.149524000 |
| C | 4.152197000  | 8.254893000  | 5.891436000 |
| C | 4.000412000  | 8.276432000  | 7.267291000 |
| C | 3.025062000  | 7.483605000  | 7.846125000 |
| C | 2.238200000  | 6.704250000  | 7.032421000 |
| C | 5.816415000  | 14.302356000 | 4.703964000 |
| C | 4.624809000  | 14.431854000 | 5.439690000 |
| C | 2.082274000  | 1.999214000  | 7.700855000 |
| C | 1.416349000  | 2.810928000  | 6.794927000 |
| C | 3.907181000  | 15.617798000 | 5.533414000 |
| C | 4.360666000  | 16.751040000 | 4.886724000 |
| C | 5.526678000  | 16.674968000 | 4.148186000 |

|   |              |              |             |
|---|--------------|--------------|-------------|
| C | 0.929136000  | 7.944611000  | 2.182999000 |
| C | 0.681551000  | 9.195202000  | 1.666397000 |
| C | 0.052453000  | 10.134793000 | 2.459295000 |
| C | -0.296310000 | 9.791962000  | 3.739553000 |
| C | -0.007616000 | 8.517764000  | 4.191298000 |
| C | -1.944056000 | 6.027949000  | 2.284970000 |
| C | -2.856027000 | 5.980893000  | 1.250267000 |
| C | -2.649695000 | 5.105550000  | 0.208065000 |
| C | -1.515127000 | 4.317447000  | 0.230559000 |
| C | -0.646604000 | 4.426407000  | 1.299003000 |
| C | 3.381864000  | 3.746903000  | 6.085255000 |
| C | 4.121112000  | 2.970112000  | 6.950132000 |
| C | 3.464669000  | 2.081307000  | 7.777333000 |
| C | 6.234749000  | 15.485734000 | 4.068521000 |
| C | 5.846311000  | 11.782163000 | 3.656139000 |
| C | 4.450810000  | 11.612022000 | 3.709187000 |
| C | 3.800036000  | 10.551138000 | 3.089114000 |
| C | 4.509890000  | 9.623434000  | 2.352451000 |
| C | 5.876601000  | 9.778318000  | 2.234359000 |
| C | 6.522791000  | 10.832570000 | 2.867928000 |
| C | 8.173867000  | 13.143461000 | 4.087078000 |
| C | 8.461958000  | 13.453831000 | 2.740652000 |
| C | 9.749621000  | 13.742846000 | 2.301840000 |
| C | 10.812402000 | 13.715894000 | 3.184712000 |
| C | 10.579048000 | 13.409965000 | 4.511831000 |

|   |              |              |             |
|---|--------------|--------------|-------------|
| C | 9.277108000  | 13.140449000 | 4.939771000 |
| C | 6.672589000  | 12.930504000 | 7.301782000 |
| C | 6.709978000  | 12.183234000 | 6.115059000 |
| C | 6.885956000  | 10.799554000 | 6.299694000 |
| C | 7.007032000  | 10.219509000 | 7.554084000 |
| C | 6.789908000  | 12.352144000 | 8.560671000 |
| C | 6.951232000  | 10.993332000 | 8.693757000 |
| H | -0.533697000 | 6.511301000  | 8.197025000 |
| H | -2.049921000 | 7.006053000  | 8.330112000 |
| H | -1.078570000 | 7.685255000  | 7.256045000 |
| H | -2.342469000 | 3.832715000  | 6.744316000 |
| H | -2.717937000 | 4.648931000  | 8.067687000 |
| H | -1.208180000 | 4.180488000  | 7.818383000 |
| H | -2.808888000 | 7.146366000  | 5.494050000 |
| H | -3.715998000 | 6.425529000  | 6.599983000 |
| H | -3.273987000 | 5.629378000  | 5.284110000 |
| H | 3.087336000  | 2.335043000  | 2.056285000 |
| H | 3.767290000  | 2.841253000  | 0.699175000 |
| H | 2.199734000  | 3.059181000  | 0.939106000 |
| H | 4.902783000  | 5.101117000  | 3.220327000 |
| H | 5.402514000  | 4.025277000  | 2.146260000 |
| H | 4.606439000  | 3.543925000  | 3.449011000 |
| H | 2.660152000  | 5.513844000  | 0.447997000 |
| H | 4.231977000  | 5.229622000  | 0.350525000 |
| H | 3.679431000  | 6.325336000  | 1.377730000 |

|   |              |              |              |
|---|--------------|--------------|--------------|
| H | 1.425049000  | 1.924466000  | 3.540860000  |
| H | 0.564069000  | -0.219612000 | 3.553981000  |
| H | -1.684300000 | -0.551531000 | 4.138813000  |
| H | -3.016121000 | 1.337021000  | 4.590559000  |
| H | -2.070315000 | 3.444018000  | 4.479966000  |
| H | 3.412715000  | 7.449087000  | 4.204420000  |
| H | 4.819659000  | 8.782761000  | 5.469682000  |
| H | 4.555797000  | 8.827714000  | 7.805262000  |
| H | 2.903127000  | 7.476897000  | 8.787481000  |
| H | 1.571975000  | 6.159626000  | 7.437868000  |
| H | 1.356475000  | 7.303098000  | 1.628908000  |
| H | 0.939529000  | 9.409155000  | 0.776028000  |
| H | -0.134835000 | 11.003620000 | 2.123766000  |
| H | -0.728722000 | 10.418487000 | 4.305641000  |
| H | -0.247850000 | 8.285443000  | 5.081668000  |
| H | -2.099949000 | 6.636620000  | 2.997266000  |
| H | -3.618783000 | 6.547001000  | 1.255890000  |
| H | -3.271553000 | 5.042916000  | -0.507979000 |
| H | -1.335059000 | 3.712128000  | -0.477988000 |
| H | 0.134279000  | 3.883703000  | 1.300877000  |
| H | 3.843048000  | 4.362804000  | 5.529665000  |
| H | 5.066779000  | 3.043681000  | 6.976750000  |
| H | 3.949819000  | 1.537399000  | 8.386346000  |
| H | 1.601284000  | 1.398351000  | 8.258882000  |
| H | 0.469760000  | 2.748971000  | 6.746191000  |

|   |              |              |             |
|---|--------------|--------------|-------------|
| H | 4.292657000  | 13.666982000 | 5.895185000 |
| H | 3.105188000  | 15.649642000 | 6.041393000 |
| H | 3.878949000  | 17.567828000 | 4.948581000 |
| H | 5.846663000  | 17.444850000 | 3.692691000 |
| H | 7.037427000  | 15.467252000 | 3.561479000 |
| H | 3.932431000  | 12.248259000 | 4.187549000 |
| H | 2.858058000  | 10.462938000 | 3.175340000 |
| H | 4.066895000  | 8.893904000  | 1.936320000 |
| H | 6.378656000  | 9.160306000  | 1.715133000 |
| H | 7.463493000  | 10.917371000 | 2.764832000 |
| H | 7.750108000  | 13.466644000 | 2.110645000 |
| H | 9.899892000  | 13.961729000 | 1.388977000 |
| H | 11.693077000 | 13.903529000 | 2.882923000 |
| H | 11.300805000 | 13.382083000 | 5.130404000 |
| H | 9.136680000  | 12.945470000 | 5.859570000 |
| H | 6.562830000  | 13.872108000 | 7.242923000 |
| H | 6.923744000  | 10.239119000 | 5.533414000 |
| H | 7.130216000  | 9.279625000  | 7.627188000 |
| H | 6.758421000  | 12.900924000 | 9.336698000 |
| H | 7.021662000  | 10.595587000 | 9.554136000 |

FICBOL (CCDC REFCODE)

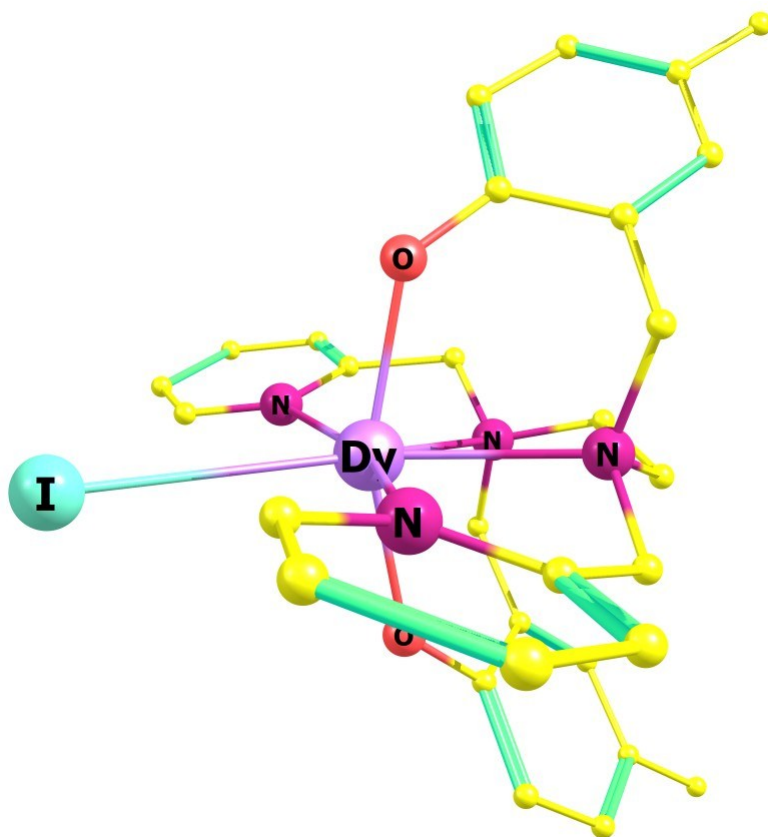

|    |          |          |          |
|----|----------|----------|----------|
| Dy | 0.00000  | 0.00000  | 0.00000  |
| O  | -1.01042 | 1.88491  | 0.10746  |
| O  | 0.89680  | -1.84449 | 0.65084  |
| N  | -1.48909 | -0.28300 | 2.10159  |
| N  | -2.22589 | -1.21025 | -0.41676 |
| N  | 1.28037  | 0.68876  | 2.13294  |
| N  | 2.22378  | 1.28406  | -0.42373 |
| Br | 0.18278  | -0.25870 | -2.81773 |
| C  | -2.37087 | 5.21189  | 4.47191  |
| C  | -2.07897 | 4.35696  | 3.28065  |
| C  | -1.44530 | 4.85582  | 2.16777  |
| C  | -1.12199 | 4.06766  | 1.08101  |
| C  | -1.39975 | 2.69162  | 1.09320  |

|   |          |          |          |
|---|----------|----------|----------|
| C | -2.12541 | 2.17978  | 2.20434  |
| C | -2.42639 | 3.00132  | 3.25975  |
| C | -2.57240 | 0.73883  | 2.16254  |
| C | -2.12265 | -1.60340 | 1.97619  |
| C | -2.82197 | -1.76103 | 0.63690  |
| C | -4.04414 | -2.43236 | 0.54286  |
| C | -4.65313 | -2.53621 | -0.68323 |
| C | -4.03883 | -1.96317 | -1.75605 |
| C | 0.40804  | 0.76665  | 3.33116  |
| C | -2.85560 | -1.34192 | -1.60976 |
| C | -0.68739 | -0.27002 | 3.34509  |
| C | 2.42709  | -0.24220 | 2.36631  |
| C | 2.03157  | -1.64049 | 2.71289  |
| C | 2.41278  | -2.18571 | 3.93375  |
| C | 2.11595  | -3.48757 | 4.28556  |
| C | 1.41478  | -4.24606 | 3.35032  |
| C | 1.03928  | -3.73793 | 2.11901  |
| C | 1.29934  | -2.40825 | 1.79507  |
| C | 2.48463  | -4.05505 | 5.64400  |
| C | 1.84040  | 2.03884  | 1.89608  |
| C | 2.64387  | 2.07778  | 0.61775  |
| C | 3.73274  | 2.88449  | 0.48538  |
| C | 4.46006  | 2.88820  | -0.67278 |
| C | 4.07195  | 2.06109  | -1.68465 |
| C | 2.94785  | 1.30816  | -1.50526 |

|   |          |          |          |
|---|----------|----------|----------|
| H | -1.72434 | 5.04127  | 5.15810  |
| H | -3.25103 | 5.00418  | 4.80455  |
| H | -2.33927 | 6.13728  | 4.21938  |
| H | -1.22549 | 5.75896  | 2.14513  |
| H | -0.71723 | 4.45154  | 0.33735  |
| H | -2.87859 | 2.64340  | 3.98948  |
| H | -3.11030 | 0.56451  | 2.94975  |
| H | -3.14543 | 0.62200  | 1.38928  |
| H | -2.76937 | -1.71653 | 2.69025  |
| H | -1.44782 | -2.29328 | 2.07024  |
| H | -4.43922 | -2.80326 | 1.29871  |
| H | -5.46203 | -2.98315 | -0.78076 |
| H | -4.43972 | -2.00212 | -2.59376 |
| H | -2.44856 | -0.98400 | -2.36387 |
| H | -0.29068 | -1.14534 | 3.47397  |
| H | -1.27506 | -0.09755 | 4.09746  |
| H | 0.00572  | 1.64754  | 3.37122  |
| H | 0.95499  | 0.65538  | 4.12533  |
| H | 2.97374  | 0.11201  | 3.08559  |
| H | 2.97520  | -0.26445 | 1.56518  |
| H | 2.88403  | -1.65533 | 4.53461  |
| H | 1.19177  | -5.12324 | 3.56105  |
| H | 0.60923  | -4.28686 | 1.50422  |
| H | 1.68560  | -4.21825 | 6.14907  |
| H | 3.03861  | -3.42823 | 6.11424  |

|   |         |          |          |
|---|---------|----------|----------|
| H | 2.96336 | -4.88030 | 5.52732  |
| H | 2.40890 | 2.28734  | 2.64149  |
| H | 1.11695 | 2.68420  | 1.84209  |
| H | 3.98505 | 3.43713  | 1.18899  |
| H | 5.20187 | 3.44084  | -0.76857 |
| H | 4.55839 | 2.01287  | -2.47534 |
| H | 2.67689 | 0.77036  | -2.21410 |

ULUKUJ (CCDC REFCODE)

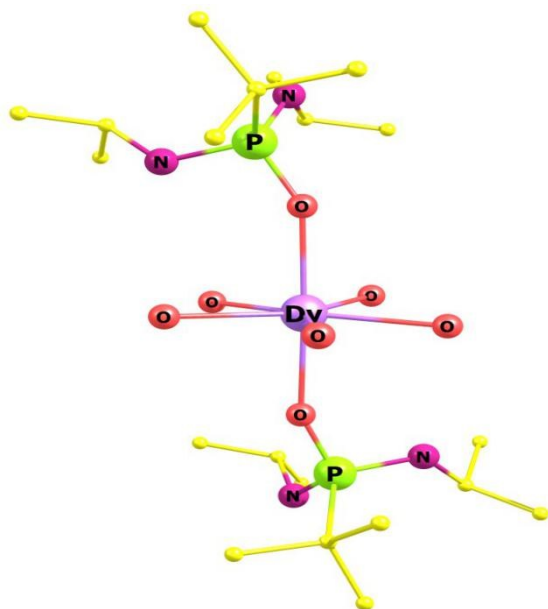

|    |             |              |             |
|----|-------------|--------------|-------------|
| Dy | 5.374237000 | 8.948249000  | 4.866054000 |
| O  | 5.298638000 | 8.595522000  | 7.044895000 |
| O  | 5.270163000 | 9.251458000  | 2.686637000 |
| O  | 5.905848000 | 6.657406000  | 4.609663000 |
| O  | 7.727459000 | 8.729182000  | 4.834221000 |
| O  | 6.273056000 | 11.119261000 | 5.023493000 |
| O  | 3.577392000 | 10.477546000 | 5.142005000 |

|   |              |              |             |
|---|--------------|--------------|-------------|
| O | 3.390840000  | 7.700403000  | 4.619443000 |
| O | 8.897395000  | 11.101138000 | 5.059545000 |
| O | 8.457759000  | 6.172160000  | 4.463729000 |
| I | 0.394314000  | 9.165197000  | 5.076804000 |
| I | 3.514824000  | 4.510079000  | 3.307191000 |
| I | 4.284888000  | 13.742878000 | 6.086067000 |
| H | 5.498486000  | 6.309444000  | 3.883255000 |
| H | 6.795419000  | 6.539651000  | 4.510329000 |
| H | 8.276997000  | 9.381571000  | 4.832495000 |
| H | 8.174550000  | 8.009376000  | 4.774965000 |
| H | 5.874455000  | 11.572270000 | 5.666676000 |
| H | 7.135042000  | 11.073325000 | 5.202603000 |
| H | 3.612345000  | 11.285258000 | 5.311909000 |
| H | 2.808387000  | 10.223931000 | 5.139320000 |
| H | 2.644980000  | 7.967868000  | 4.717435000 |
| H | 3.361252000  | 6.958745000  | 4.314728000 |
| P | 10.150459000 | 11.893429000 | 5.289472000 |
| P | 9.460336000  | 5.091604000  | 4.150384000 |
| P | 4.952486000  | 7.697653000  | 8.210447000 |
| P | 5.171381000  | 10.066881000 | 1.420217000 |
| N | 3.879361000  | 8.286922000  | 9.271678000 |
| N | 4.308493000  | 6.339614000  | 7.569374000 |
| N | 4.989824000  | 11.621085000 | 1.886782000 |
| N | 3.931112000  | 9.712539000  | 0.438376000 |
| N | 9.820621000  | 13.469362000 | 5.035383000 |

|   |              |              |              |
|---|--------------|--------------|--------------|
| N | 11.416334000 | 11.579559000 | 4.317988000  |
| N | 8.784426000  | 3.640842000  | 4.447813000  |
| N | 10.851113000 | 5.108834000  | 5.001824000  |
| C | 10.742205000 | 11.617849000 | 6.997529000  |
| C | 10.886742000 | 10.116612000 | 7.246825000  |
| C | 12.074049000 | 12.347236000 | 7.244907000  |
| C | 9.657737000  | 12.180372000 | 7.933346000  |
| C | 8.507030000  | 14.106988000 | 5.223697000  |
| C | 7.803885000  | 14.279177000 | 3.908184000  |
| C | 8.686499000  | 15.423779000 | 5.958159000  |
| C | 11.335947000 | 11.633140000 | 2.840050000  |
| C | 11.404661000 | 10.245406000 | 2.251329000  |
| C | 12.426156000 | 12.533579000 | 2.293517000  |
| C | 9.970314000  | 5.233938000  | 2.408577000  |
| C | 10.995118000 | 4.154776000  | 2.055728000  |
| C | 10.546745000 | 6.640464000  | 2.166952000  |
| C | 8.713372000  | 5.049355000  | 1.537961000  |
| C | 7.347800000  | 3.321047000  | 4.345410000  |
| C | 7.137449000  | 2.020920000  | 3.587936000  |
| C | 6.694445000  | 3.257913000  | 5.706946000  |
| C | 10.866895000 | 5.234188000  | 6.470174000  |
| C | 11.976361000 | 4.354650000  | 7.018623000  |
| C | 11.039358000 | 6.683696000  | 6.886305000  |
| C | 6.468666000  | 7.361543000  | 9.156811000  |
| C | 6.202087000  | 6.370127000  | 10.280558000 |

|   |             |              |              |
|---|-------------|--------------|--------------|
| C | 7.035550000 | 8.672402000  | 9.724437000  |
| C | 7.497947000 | 6.757281000  | 8.171135000  |
| C | 2.580965000 | 8.866992000  | 8.867245000  |
| C | 2.640332000 | 10.390006000 | 8.876833000  |
| C | 1.473972000 | 8.349997000  | 9.758955000  |
| C | 3.356874000 | 5.404912000  | 8.173053000  |
| C | 3.914983000 | 3.986716000  | 8.184559000  |
| C | 2.017717000 | 5.441906000  | 7.455849000  |
| C | 6.690629000 | 9.780684000  | 0.456594000  |
| C | 7.862349000 | 10.214072000 | 1.340442000  |
| C | 6.796144000 | 8.288743000  | 0.124648000  |
| C | 6.689530000 | 10.604410000 | -0.836865000 |
| C | 4.407413000 | 12.720063000 | 1.110323000  |
| C | 3.179793000 | 13.267241000 | 1.827527000  |
| C | 5.426508000 | 13.830480000 | 0.891710000  |
| C | 2.533585000 | 9.588175000  | 0.905134000  |
| C | 1.611595000 | 10.360258000 | -0.017259000 |
| C | 2.151366000 | 8.123905000  | 0.999099000  |
| H | 5.605230000 | 6.776936000  | 10.942149000 |
| H | 7.049632000 | 6.127867000  | 10.712030000 |
| H | 5.782161000 | 5.563829000  | 9.914285000  |
| H | 7.903200000 | 8.497690000  | 10.144404000 |
| H | 6.416783000 | 9.033736000  | 10.393699000 |
| H | 7.148721000 | 9.320414000  | 8.999563000  |
| H | 7.150189000 | 5.914432000  | 7.814451000  |

|   |             |              |              |
|---|-------------|--------------|--------------|
| H | 8.340771000 | 6.590650000  | 8.642879000  |
| H | 7.650485000 | 7.385955000  | 7.436673000  |
| H | 2.388706000 | 8.570607000  | 7.931428000  |
| H | 3.354734000 | 10.693809000 | 8.280442000  |
| H | 2.819623000 | 10.704777000 | 9.787720000  |
| H | 1.781823000 | 10.751918000 | 8.570008000  |
| H | 1.639688000 | 8.631427000  | 10.683265000 |
| H | 1.448801000 | 7.371222000  | 9.716766000  |
| H | 0.614898000 | 8.710737000  | 9.457883000  |
| H | 3.207397000 | 5.683925000  | 9.122293000  |
| H | 4.786913000 | 3.981794000  | 8.633290000  |
| H | 4.022207000 | 3.670297000  | 7.262166000  |
| H | 3.298604000 | 3.395754000  | 8.662055000  |
| H | 2.139479000 | 5.162038000  | 6.523868000  |
| H | 1.659907000 | 6.354061000  | 7.478861000  |
| H | 1.391911000 | 4.833633000  | 7.900746000  |
| H | 7.753870000 | 11.156369000 | 1.587820000  |
| H | 8.702944000 | 10.098512000 | 0.849522000  |
| H | 7.880486000 | 9.664250000  | 2.151611000  |
| H | 7.665578000 | 8.106600000  | -0.287649000 |
| H | 6.080666000 | 8.040066000  | -0.496673000 |
| H | 6.709945000 | 7.764131000  | 0.949240000  |
| H | 5.953610000 | 10.308002000 | -1.413313000 |
| H | 7.541242000 | 10.481345000 | -1.304007000 |
| H | 6.570500000 | 11.552801000 | -0.619403000 |

|   |              |              |              |
|---|--------------|--------------|--------------|
| H | 4.123643000  | 12.366788000 | 0.218613000  |
| H | 3.439749000  | 13.603840000 | 2.709649000  |
| H | 2.517528000  | 12.552857000 | 1.931080000  |
| H | 2.791935000  | 13.998377000 | 1.302089000  |
| H | 6.206279000  | 13.468828000 | 0.419967000  |
| H | 5.707807000  | 14.191496000 | 1.758491000  |
| H | 5.022365000  | 14.545331000 | 0.354766000  |
| H | 2.472091000  | 9.987328000  | 1.819856000  |
| H | 1.652191000  | 9.975669000  | -0.918558000 |
| H | 1.893913000  | 11.298772000 | -0.051777000 |
| H | 0.693277000  | 10.306529000 | 0.318331000  |
| H | 2.812319000  | 7.647956000  | 1.545631000  |
| H | 2.131879000  | 7.733602000  | 0.099718000  |
| H | 1.266461000  | 8.042573000  | 1.411395000  |
| H | 4.109968000  | 8.534181000  | 9.971815000  |
| H | 4.493603000  | 6.169844000  | 6.750152000  |
| H | 5.190982000  | 11.799110000 | 2.698143000  |
| H | 4.096228000  | 9.423883000  | -0.339425000 |
| H | 10.019386000 | 9.679317000  | 7.120259000  |
| H | 11.537085000 | 9.741752000  | 6.617833000  |
| H | 11.196612000 | 9.966741000  | 8.165382000  |
| H | 12.772283000 | 11.950327000 | 6.684951000  |
| H | 11.974461000 | 13.295150000 | 7.020541000  |
| H | 12.323045000 | 12.260151000 | 8.188394000  |
| H | 9.911513000  | 12.014459000 | 8.865327000  |

|   |              |              |             |
|---|--------------|--------------|-------------|
| H | 9.566845000  | 13.144596000 | 7.785686000 |
| H | 8.802677000  | 11.738279000 | 7.745415000 |
| H | 7.948900000  | 13.505807000 | 5.797076000 |
| H | 7.653079000  | 13.401633000 | 3.499723000 |
| H | 6.942937000  | 14.724542000 | 4.053926000 |
| H | 8.357318000  | 14.826495000 | 3.311793000 |
| H | 9.242898000  | 16.024972000 | 5.417380000 |
| H | 7.810433000  | 15.837366000 | 6.109654000 |
| H | 9.123346000  | 15.261676000 | 6.819187000 |
| H | 10.452813000 | 12.030846000 | 2.592672000 |
| H | 10.692134000 | 9.690886000  | 2.634860000 |
| H | 11.290683000 | 10.297100000 | 1.279077000 |
| H | 12.274717000 | 9.845259000  | 2.458436000 |
| H | 13.300663000 | 12.207437000 | 2.594590000 |
| H | 12.394494000 | 12.526563000 | 1.315512000 |
| H | 12.288512000 | 13.447882000 | 2.619519000 |
| H | 10.451685000 | 13.984163000 | 4.774965000 |
| H | 11.987624000 | 11.028817000 | 4.650317000 |
| H | 11.175274000 | 4.177903000  | 1.093064000 |
| H | 11.825744000 | 4.320512000  | 2.548566000 |
| H | 10.641014000 | 3.274421000  | 2.301188000 |
| H | 10.774501000 | 6.741637000  | 1.219630000 |
| H | 9.879014000  | 7.314902000  | 2.416247000 |
| H | 11.352105000 | 6.762384000  | 2.711567000 |
| H | 8.354694000  | 4.146415000  | 1.672197000 |

|   |              |             |             |
|---|--------------|-------------|-------------|
| H | 8.037034000  | 5.711584000 | 1.794927000 |
| H | 8.948367000  | 5.169707000 | 0.594474000 |
| H | 6.906561000  | 4.053282000 | 3.827643000 |
| H | 7.535908000  | 1.280775000 | 4.092279000 |
| H | 6.175914000  | 1.859553000 | 3.478629000 |
| H | 7.560859000  | 2.083137000 | 2.707731000 |
| H | 6.839519000  | 4.103935000 | 6.178690000 |
| H | 5.733250000  | 3.101088000 | 5.601475000 |
| H | 7.089514000  | 2.524348000 | 6.224714000 |
| H | 9.993666000  | 4.903370000 | 6.826858000 |
| H | 12.832731000 | 4.628236000 | 6.629339000 |
| H | 12.015557000 | 4.448942000 | 7.992793000 |
| H | 11.796017000 | 3.419483000 | 6.788505000 |
| H | 10.301009000 | 7.217560000 | 6.525786000 |
| H | 11.039935000 | 6.745270000 | 7.864310000 |
| H | 11.889868000 | 7.023597000 | 6.537292000 |
| H | 9.263768000  | 3.071719000 | 4.713600000 |
| H | 11.567623000 | 5.293919000 | 4.583199000 |

NAFMIT (CCDC REFCODE)

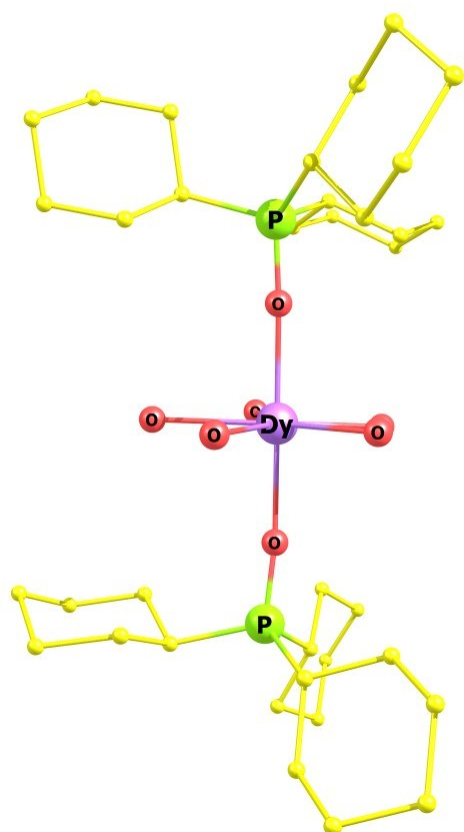

|    |             |             |              |
|----|-------------|-------------|--------------|
| Dy | 5.257516000 | 3.659289000 | 2.839217000  |
| O  | 6.735587000 | 2.099751000 | 2.417390000  |
| O  | 3.792688000 | 5.258631000 | 3.266134000  |
| O  | 4.064413000 | 2.301897000 | 4.364186000  |
| O  | 3.663485000 | 2.398699000 | 1.670431000  |
| O  | 5.313025000 | 4.296304000 | 0.573023000  |
| O  | 6.916170000 | 5.322691000 | 2.588427000  |
| O  | 6.224905000 | 3.994509000 | 4.938497000  |
| O  | 4.737033000 | 2.892674000 | 6.810887000  |
| O  | 4.150193000 | 2.457065000 | -0.932813000 |
| Br | 1.436027000 | 0.730856000 | 3.260980000  |
| Br | 7.480984000 | 6.376837000 | -0.454167000 |
| Br | 8.199002000 | 6.494138000 | 5.292457000  |

|   |              |             |              |
|---|--------------|-------------|--------------|
| H | 3.327071000  | 1.883370000 | 4.309750000  |
| H | 4.286923000  | 2.494077000 | 5.163326000  |
| H | 3.175434000  | 1.726778000 | 1.855319000  |
| H | 3.817012000  | 2.421476000 | 0.834249000  |
| H | 5.970644000  | 4.632264000 | 0.151389000  |
| H | 4.937822000  | 3.704103000 | 0.090189000  |
| H | 7.370839000  | 5.798160000 | 3.127629000  |
| H | 7.004743000  | 5.541919000 | 1.771572000  |
| H | 6.685542000  | 4.649347000 | 5.224526000  |
| H | 5.745842000  | 3.635772000 | 5.540187000  |
| P | 4.669857000  | 2.774803000 | 8.311248000  |
| P | 3.446895000  | 2.280970000 | -2.250218000 |
| P | 7.680967000  | 0.975423000 | 2.022491000  |
| P | 2.918605000  | 6.484601000 | 3.455209000  |
| C | 7.993871000  | 1.098988000 | 0.234170000  |
| C | 8.923105000  | 0.019930000 | -0.317272000 |
| C | 9.091374000  | 0.175098000 | -1.817955000 |
| C | 9.568195000  | 1.565916000 | -2.193850000 |
| C | 8.632338000  | 2.627892000 | -1.645307000 |
| C | 8.501607000  | 2.491230000 | -0.124654000 |
| C | 9.262683000  | 1.138848000 | 2.924704000  |
| C | 9.114019000  | 2.038538000 | 4.152886000  |
| C | 10.468682000 | 2.222177000 | 4.862481000  |
| C | 11.092424000 | 0.892572000 | 5.235477000  |
| C | 11.246721000 | 0.002847000 | 4.021790000  |

|   |              |              |              |
|---|--------------|--------------|--------------|
| C | 9.911454000  | -0.212110000 | 3.290614000  |
| C | 6.874772000  | -0.606437000 | 2.405794000  |
| C | 6.354873000  | -0.585083000 | 3.851075000  |
| C | 5.631725000  | -1.896182000 | 4.199269000  |
| C | 4.482479000  | -2.148152000 | 3.208477000  |
| C | 4.996673000  | -2.189435000 | 1.770605000  |
| C | 5.718162000  | -0.902537000 | 1.420800000  |
| C | 2.799734000  | 7.386853000  | 1.883664000  |
| C | 4.148226000  | 8.054502000  | 1.516465000  |
| C | 4.090372000  | 8.712187000  | 0.139149000  |
| C | 3.683334000  | 7.722813000  | -0.932169000 |
| C | 2.320675000  | 7.102141000  | -0.593638000 |
| C | 2.361412000  | 6.410291000  | 0.762742000  |
| C | 1.254973000  | 5.973258000  | 4.018246000  |
| C | 0.987975000  | 4.508415000  | 3.692277000  |
| C | -0.368054000 | 4.069958000  | 4.262079000  |
| C | -1.487135000 | 4.948295000  | 3.746713000  |
| C | -1.250847000 | 6.393208000  | 4.115844000  |
| C | 0.106599000  | 6.894301000  | 3.541533000  |
| C | 3.659139000  | 7.547715000  | 4.725587000  |
| C | 3.886815000  | 6.773298000  | 6.026887000  |
| C | 4.614248000  | 7.653059000  | 7.053432000  |
| C | 3.842773000  | 8.934263000  | 7.309182000  |
| C | 6.289839000  | 3.193045000  | 9.026962000  |
| C | 3.606141000  | 9.697291000  | 6.020767000  |

|   |              |              |              |
|---|--------------|--------------|--------------|
| C | 2.871652000  | 8.831766000  | 4.993255000  |
| C | 7.372056000  | 2.326097000  | 8.352155000  |
| C | 8.792015000  | 2.727541000  | 8.808898000  |
| C | 9.043980000  | 4.205196000  | 8.604684000  |
| C | 8.001544000  | 5.043673000  | 9.332639000  |
| C | 6.594793000  | 4.686360000  | 8.871064000  |
| C | 3.434733000  | 3.966038000  | 8.905851000  |
| C | 3.390664000  | 0.519599000  | -2.677972000 |
| C | 4.005762000  | -1.342417000 | 8.159214000  |
| C | 4.444339000  | -1.742437000 | 9.548771000  |
| C | 4.009277000  | -0.698968000 | 10.567908000 |
| C | 4.594994000  | 0.669073000  | 10.218103000 |
| C | 4.790631000  | -0.024201000 | -2.955948000 |
| C | 2.118633000  | 3.847883000  | 8.107356000  |
| C | 1.143230000  | 4.951142000  | 8.509986000  |
| C | 0.885417000  | 4.951142000  | 10.004548000 |
| C | 2.157485000  | 5.035132000  | 10.806587000 |
| C | 3.142912000  | 3.927602000  | 10.413298000 |
| C | 4.142763000  | 1.110377000  | 8.810187000  |
| C | 4.547646000  | 0.038436000  | 7.774300000  |
| C | 4.768115000  | -1.528903000 | -3.278374000 |
| C | -0.182204000 | 3.769587000  | -0.796885000 |
| C | 1.187037000  | 3.049266000  | -0.788833000 |
| C | 4.369423000  | 3.177386000  | -3.550552000 |
| C | 4.628624000  | 4.626570000  | -3.108947000 |

|   |              |              |              |
|---|--------------|--------------|--------------|
| C | 5.487194000  | 5.361127000  | -4.151597000 |
| C | 4.852692000  | 5.307032000  | -5.514419000 |
| C | 4.616940000  | 3.882048000  | -5.952481000 |
| C | 3.749860000  | 3.109055000  | -4.938497000 |
| C | 4.102425000  | -2.321826000 | -2.175168000 |
| C | 2.698580000  | -1.778026000 | -1.881731000 |
| C | 2.726856000  | -0.291830000 | -1.539979000 |
| C | 1.763248000  | 2.978088000  | -2.213176000 |
| C | 0.759900000  | 2.280543000  | -3.175300000 |
| C | -0.581586000 | 3.003712000  | -3.166604000 |
| C | -1.154124000 | 3.080584000  | -1.753212000 |
| H | 7.113289000  | 0.985104000  | -0.222252000 |
| H | 9.807855000  | 0.088261000  | 0.122399000  |
| H | 8.548143000  | -0.874066000 | -0.115957000 |
| H | 9.742825000  | -0.492552000 | -2.141991000 |
| H | 8.226732000  | -0.002847000 | -2.264391000 |
| H | 9.612185000  | 1.642788000  | -3.179166000 |
| H | 10.477472000 | 1.709696000  | -1.832771000 |
| H | 7.741413000  | 2.533937000  | -2.064686000 |
| H | 8.982248000  | 3.526158000  | -1.868203000 |
| H | 9.384173000  | 2.643551000  | 0.299557000  |
| H | 7.870795000  | 3.174539000  | 0.219031000  |
| H | 9.899060000  | 1.601505000  | 2.306264000  |
| H | 8.462354000  | 1.635670000  | 4.780022000  |
| H | 8.766736000  | 2.922569000  | 3.874910000  |

|   |              |              |              |
|---|--------------|--------------|--------------|
| H | 11.086772000 | 2.716152000  | 4.267877000  |
| H | 10.336697000 | 2.763130000  | 5.681913000  |
| H | 11.981914000 | 1.049164000  | 5.643261000  |
| H | 10.524446000 | 0.439880000  | 5.907386000  |
| H | 11.607435000 | -0.875489000 | 4.306529000  |
| H | 11.896378000 | 0.411409000  | 3.398196000  |
| H | 9.296807000  | -0.727439000 | 3.871689000  |
| H | 10.068956000 | -0.737404000 | 2.467316000  |
| H | 7.555083000  | -1.335299000 | 2.325590000  |
| H | 5.732020000  | 0.175098000  | 3.965099000  |
| H | 7.113502000  | -0.452692000 | 4.470802000  |
| H | 5.270892000  | -1.842087000 | 5.118231000  |
| H | 6.273793000  | -2.649245000 | 4.161583000  |
| H | 4.042592000  | -3.009406000 | 3.427186000  |
| H | 3.808887000  | -1.429254000 | 3.298344000  |
| H | 5.615062000  | -2.955311000 | 1.662056000  |
| H | 4.235028000  | -2.320403000 | 1.149911000  |
| H | 5.075038000  | -0.152321000 | 1.439805000  |
| H | 6.081679000  | -0.970868000 | 0.502482000  |
| H | 2.106125000  | 8.100056000  | 1.974497000  |
| H | 4.371579000  | 8.736388000  | 2.196749000  |
| H | 4.862263000  | 7.369770000  | 1.523552000  |
| H | 3.438920000  | 9.459556000  | 0.161052000  |
| H | 4.980943000  | 9.088007000  | -0.083747000 |
| H | 4.366913000  | 7.008186000  | -1.001743000 |

|   |              |              |              |
|---|--------------|--------------|--------------|
| H | 3.630574000  | 8.182623000  | -1.807003000 |
| H | 1.630135000  | 7.811074000  | -0.583008000 |
| H | 2.076249000  | 6.445880000  | -1.291637000 |
| H | 2.993046000  | 5.650110000  | 0.724734000  |
| H | 1.462422000  | 6.050130000  | 0.972754000  |
| H | 1.265353000  | 6.037318000  | 5.015158000  |
| H | 1.706279000  | 3.946108000  | 4.077836000  |
| H | 0.990803000  | 4.380294000  | 2.712115000  |
| H | -0.544700000 | 3.128985000  | 4.006973000  |
| H | -0.339152000 | 4.118359000  | 5.250294000  |
| H | -1.545565000 | 4.864305000  | 2.760431000  |
| H | -2.346844000 | 4.645076000  | 4.132593000  |
| H | -1.247373000 | 6.485739000  | 5.102126000  |
| H | -1.988118000 | 6.949820000  | 3.758953000  |
| H | 0.069314000  | 6.895725000  | 2.551063000  |
| H | 0.275405000  | 7.821039000  | 3.845921000  |
| H | 4.558316000  | 7.822462000  | 4.387055000  |
| H | 4.425160000  | 5.964716000  | 5.842965000  |
| H | 3.015701000  | 6.482892000  | 6.396984000  |
| H | 4.718344000  | 7.154813000  | 7.901209000  |
| H | 5.518057000  | 7.873710000  | 6.715867000  |
| H | 2.971382000  | 8.716458000  | 7.727273000  |
| H | 4.350027000  | 9.503687000  | 7.939862000  |
| H | 4.473347000  | 9.986273000  | 5.646482000  |
| H | 3.069075000  | 10.507296000 | 6.213385000  |

|   |             |             |              |
|---|-------------|-------------|--------------|
| H | 1.969544000 | 8.603997000 | 5.334041000  |
| H | 2.765215000 | 9.337130000 | 4.148699000  |
| H | 6.270938000 | 2.972393000 | 10.001327000 |
| H | 7.302656000 | 2.425746000 | 7.369738000  |
| H | 7.213826000 | 1.375159000 | 8.574406000  |
| H | 8.901812000 | 2.505466000 | 9.766191000  |
| H | 9.458108000 | 2.206518000 | 8.297397000  |
| H | 9.016508000 | 4.413036000 | 7.637084000  |
| H | 9.947775000 | 4.434389000 | 8.941605000  |
| H | 8.077126000 | 4.891352000 | 10.307326000 |
| H | 8.169816000 | 6.003153000 | 9.157415000  |
| H | 6.491963000 | 4.939753000 | 7.920535000  |
| H | 5.937536000 | 5.207382000 | 9.398992000  |
| H | 3.800541000 | 4.875693000 | 8.712911000  |
| H | 2.311096000 | 3.916214000 | 7.141044000  |
| H | 1.708117000 | 2.963852000 | 8.278071000  |
| H | 1.514036000 | 5.828055000 | 8.242639000  |
| H | 0.284178000 | 4.820174000 | 8.033272000  |
| H | 0.307111000 | 5.721288000 | 10.233242000 |
| H | 0.400472000 | 4.124053000 | 10.249347000 |
| H | 1.941905000 | 4.956836000 | 11.769677000 |
| H | 2.579502000 | 5.919162000 | 10.658419000 |
| H | 2.762787000 | 3.046418000 | 10.651977000 |
| H | 3.988424000 | 4.044334000 | 10.916102000 |
| H | 3.144843000 | 1.123189000 | 8.825647000  |

|   |              |              |              |
|---|--------------|--------------|--------------|
| H | 4.195443000  | 0.293253000  | 6.883361000  |
| H | 5.536880000  | -0.001424000 | 7.711168000  |
| H | 3.016437000  | -1.329605000 | 8.120240000  |
| H | 4.329820000  | -2.014337000 | 7.508242000  |
| H | 5.430444000  | -1.836392000 | 9.569708000  |
| H | 4.045168000  | -2.619350000 | 9.782296000  |
| H | 4.316518000  | -0.969444000 | 11.470121000 |
| H | 3.021157000  | -0.642026000 | 10.581114000 |
| H | 5.584844000  | 0.623519000  | 10.249347000 |
| H | 4.298722000  | 1.336723000  | 10.883892000 |
| H | 2.840130000  | 0.411409000  | -3.504491000 |
| H | 5.363601000  | 0.130968000  | -2.164538000 |
| H | 5.187845000  | 0.466928000  | -3.720300000 |
| H | 4.280949000  | -1.674107000 | -4.126151000 |
| H | 5.698076000  | -1.852052000 | -3.401417000 |
| H | 4.651879000  | -2.273425000 | -1.352836000 |
| H | 4.036521000  | -3.272764000 | -2.444769000 |
| H | 2.120025000  | -1.918959000 | -2.673463000 |
| H | 2.305310000  | -2.279120000 | -1.124143000 |
| H | 3.232108000  | -0.156592000 | -0.698966000 |
| H | 1.801111000  | 0.031318000  | -1.397931000 |
| H | 1.845009000  | 3.923331000  | -2.528516000 |
| H | 1.129954000  | 2.279120000  | -4.093941000 |
| H | 0.630409000  | 1.340994000  | -2.895714000 |
| H | -1.217699000 | 2.523972000  | -3.752511000 |

|   |              |             |              |
|---|--------------|-------------|--------------|
| H | -0.464959000 | 3.919061000 | -3.523817000 |
| H | -1.344216000 | 2.166658000 | -1.426920000 |
| H | -2.006249000 | 3.583101000 | -1.771572000 |
| H | -0.560165000 | 3.766740000 | 0.119178000  |
| H | -0.057302000 | 4.711984000 | -1.075827000 |
| H | 1.814749000  | 3.538970000 | -0.199704000 |
| H | 1.078172000  | 2.133916000 | -0.428398000 |
| H | 5.265707000  | 2.737506000 | -3.617227000 |
| H | 5.092624000  | 4.629417000 | -2.235401000 |
| H | 3.764999000  | 5.099192000 | -2.998788000 |
| H | 5.599103000  | 6.306371000 | -3.878131000 |
| H | 6.384528000  | 4.945447000 | -4.190572000 |
| H | 5.442882000  | 5.759724000 | -6.168290000 |
| H | 3.990484000  | 5.792466000 | -5.495093000 |
| H | 5.490288000  | 3.423662000 | -6.055554000 |
| H | 4.166280000  | 3.882048000 | -6.835045000 |
| H | 2.837889000  | 3.497687000 | -4.915306000 |
| H | 3.674397000  | 2.162388000 | -5.221305000 |

IMOTUB(CCDC REFCODE)

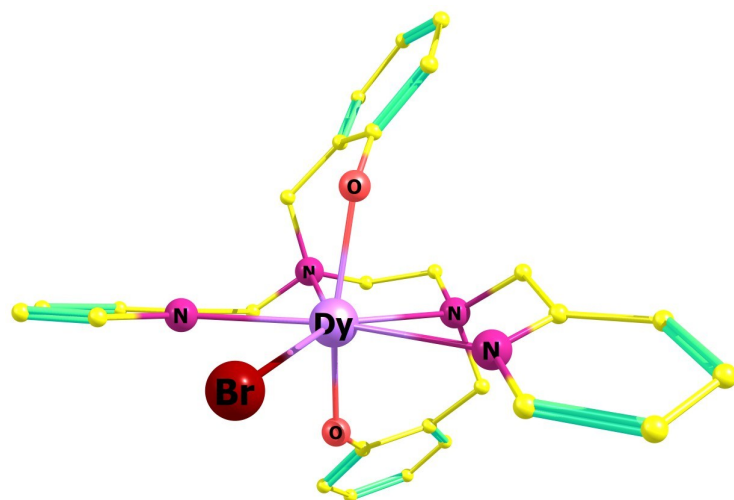

|    |          |           |          |
|----|----------|-----------|----------|
| Dy | 4.356800 | 0.169794  | 4.270750 |
| O  | 5.188077 | 0.623469  | 2.325850 |
| O  | 3.525523 | 0.623469  | 6.215650 |
| Br | 4.356800 | -2.681647 | 4.270750 |
| N  | 5.759690 | 2.286285  | 4.716616 |
| N  | 6.602295 | -0.269486 | 5.493893 |
| N  | 2.953910 | 2.286285  | 3.824884 |
| N  | 2.111305 | -0.269486 | 3.047607 |
| C  | 7.252329 | -1.450009 | 5.582724 |
| C  | 8.457420 | -1.603008 | 6.254086 |
| C  | 9.004634 | -0.516370 | 6.899824 |
| C  | 8.339787 | 0.691971  | 6.845158 |

|   |           |           |           |
|---|-----------|-----------|-----------|
| C | 7.145152  | 0.785856  | 6.125964  |
| C | 6.393168  | 2.093298  | 6.050799  |
| C | 4.923184  | 3.522444  | 4.774699  |
| C | 6.872416  | 2.441022  | 3.718969  |
| C | 6.455906  | 2.639225  | 2.301080  |
| C | 6.916856  | 3.738033  | 1.571636  |
| C | 6.637149  | 3.887554  | 0.215246  |
| C | 5.845954  | 2.955654  | -0.421950 |
| C | 5.353636  | 1.844676  | 0.276745  |
| C | 5.644670  | 1.669075  | 1.638260  |
| C | 1.461271  | -1.450009 | 2.958776  |
| C | 0.256180  | -1.603008 | 2.287414  |
| C | -0.291034 | -0.516370 | 1.641676  |
| C | 0.373813  | 0.691971  | 1.696342  |
| C | 1.568448  | 0.785856  | 2.415536  |
| C | 2.320432  | 2.093298  | 2.490701  |
| C | 3.790416  | 3.522444  | 3.766801  |
| C | 1.841184  | 2.441022  | 4.822531  |
| C | 2.257694  | 2.639225  | 6.240420  |
| C | 1.796744  | 3.738033  | 6.969864  |
| C | 2.076451  | 3.887554  | 8.326254  |
| C | 2.867646  | 2.955654  | 8.963450  |
| C | 3.359964  | 1.844676  | 8.264755  |
| C | 3.068930  | 1.669075  | 6.903240  |
| H | 6.866317  | -2.211525 | 5.165899  |

|   |           |           |           |
|---|-----------|-----------|-----------|
| H | 8.898328  | -2.444500 | 6.266044  |
| H | 9.824584  | -0.598085 | 7.373023  |
| H | 8.690945  | 1.451748  | 7.294441  |
| H | 5.693466  | 2.107207  | 6.751202  |
| H | 7.017933  | 2.840905  | 6.228462  |
| H | 5.500024  | 4.310039  | 4.610702  |
| H | 4.543271  | 3.611114  | 5.685222  |
| H | 7.427473  | 3.214708  | 3.990589  |
| H | 7.445771  | 1.634303  | 3.765093  |
| H | 7.434444  | 4.402186  | 2.012377  |
| H | 6.990050  | 4.624729  | -0.266495 |
| H | 5.632471  | 3.068664  | -1.341015 |
| H | 4.818621  | 1.204864  | -0.175955 |
| H | 1.847283  | -2.211525 | 3.375601  |
| H | -0.184728 | -2.444500 | 2.275456  |
| H | -1.110984 | -0.598085 | 1.168477  |
| H | 0.022655  | 1.451748  | 1.247059  |
| H | 3.020134  | 2.107207  | 1.790298  |
| H | 1.695667  | 2.840905  | 2.313038  |
| H | 3.213576  | 4.310039  | 3.930798  |
| H | 4.170329  | 3.611114  | 2.856278  |
| H | 1.286127  | 3.214708  | 4.550911  |
| H | 1.267829  | 1.634303  | 4.776407  |
| H | 1.279156  | 4.402186  | 6.529123  |
| H | 1.723550  | 4.624729  | 8.807995  |

|   |          |          |          |
|---|----------|----------|----------|
| H | 3.081129 | 3.068664 | 9.882515 |
| H | 3.894979 | 1.204864 | 8.717455 |

The decomposition of the wave functions of various KDs in to  $|J, m_J\rangle$  will be given below. "Re" and "Im" refer to the real and imaginary parts of the coefficients  $C_{\{m,n\}}$ . These coefficients are normalized

| KD0-1  | Re        | Im        | %               | ULUKUJ | KD0-2  | Re        | Im        | %               |
|--------|-----------|-----------|-----------------|--------|--------|-----------|-----------|-----------------|
| ImJ>   |           |           |                 |        | ImJ>   |           |           |                 |
| -13/2> | 3.15E-03  | -1.00E+00 | 9.99E-01        |        | -13/2> | 0.00E+00  | 0.00E+00  | <b>0.00E+00</b> |
| -13/2  | -8.00E-03 | 2.52E-04  | 6.99E-06        |        | -13/2  | -1.40E-05 | -1.20E-05 | 3.40E-08        |
| -11/2> | -1.92E-03 | 2.03E-03  | 7.83E-04        |        | -11/2> | -2.00E-05 | -9.00E-06 | 4.81E-08        |
| -9/2>  | -2.27E-02 | -1.77E-03 | 5.18E-02        |        | -9/2>  | -1.63E-04 | 6.00E-06  | 2.66E-06        |
| -7/2>  | -3.51E-03 | 3.27E-04  | 1.27E-03        |        | -7/2>  | 8.90E-05  | 7.40E-05  | 1.44E-06        |
| -5/2>  | -7.36E-04 | 1.51E-03  | 2.82E-04        |        | -5/2>  | 3.76E-04  | -2.80E-04 | 2.20E-05        |
| -3/2>  | 4.77E-04  | 2.80E-03  | 8.04E-04        |        | -3/2>  | 6.73E-04  | -1.75E-04 | 4.84E-05        |
| -1/2>  | 4.00E-06  | 1.42E-04  | 2.02E-06        |        | -1/2>  | -4.26E-04 | 6.11E-04  | 5.55E-05        |
| [1/2>  | 2.70E-05  | 9.50E-05  | 9.75E-07        |        | [1/2>  | -1.96E-04 | 4.52E-04  | 2.43E-05        |
| [3/2>  | 1.94E-04  | -1.90E-05 | 3.80E-06        |        | [3/2>  | -8.40E-05 | 8.92E-03  | 7.96E-03        |
| [5/2>  | 4.20E-05  | -1.30E-05 | 1.93E-07        |        | [5/2>  | -5.41E-03 | -3.82E-03 | 4.38E-03        |
| [7/2>  | 7.00E-06  | -6.00E-06 | 8.50E-09        |        | [7/2>  | -7.78E-03 | -1.03E-02 | 1.66E-02        |
| [9/2>  | -5.00E-06 | -1.50E-05 | 2.50E-08        |        | [9/2>  | -1.27E-02 | -2.41E-02 | 7.42E-02        |
| [11/2> | 0.00E+00  | -2.00E-06 | 4.00E-10        |        | [11/2> | -1.04E-03 | 2.14E-03  | 5.65E-04        |
| [13/2> | 1.00E-06  | -1.00E-06 | 2.00E-10        |        | [13/2> | -6.85E-04 | 1.39E-04  | 4.89E-05        |
| [15/2> | 0.00E+00  | 0.00E+00  | 0.00E+00        |        | [15/2> | 9.99E-01  | 0.00E+00  | 9.99E-01        |
| KD1-1  | Re        | Im        | %               |        | KD1-2  | Re        | Im        | %               |
| ImJ>   |           |           |                 |        | ImJ>   |           |           |                 |
| -13/2> | -4.60E-05 | 6.50E-05  | 6.34E-07        |        | -13/2> | -1.72E-04 | 2.43E-04  | 8.86E-06        |
| -13/2  | 2.56E-01  | 2.26E-01  | 1.17E+01        |        | -13/2  | -7.03E-01 | -6.11E-01 | <b>8.68E+01</b> |
| -11/2> | 1.00E-02  | -9.78E-03 | 1.97E-02        |        | -11/2> | -2.97E-02 | 1.72E-02  | 1.18E-01        |
| -9/2>  | 2.17E-03  | -2.92E-03 | 1.32E-03        |        | -9/2>  | -4.99E-03 | 8.82E-03  | 1.03E-02        |
| -7/2>  | 2.70E-02  | -2.50E-03 | 8.80E-02        |        | -7/2>  | -5.28E-02 | 4.28E-02  | 3.31E-01        |
| -5/2>  | -1.59E-02 | 6.52E-03  | 2.95E-02        |        | -5/2>  | 4.51E-02  | -8.07E-03 | 2.10E-01        |
| -3/2>  | 7.18E-03  | -4.63E-03 | 7.29E-03        |        | -3/2>  | -3.78E-02 | -8.03E-03 | 1.50E-01        |
| -1/2>  | 1.84E-02  | -1.71E-02 | 6.30E-02        |        | -1/2>  | -4.84E-02 | 5.39E-02  | 5.25E-01        |
| [1/2>  | -7.19E-03 | 1.42E-02  | 2.84E-01        |        | [1/2>  | -1.46E-02 | 1.18E-03  | 6.30E-02        |
| [3/2>  | 1.53E-02  | -3.55E-02 | 1.50E-01        |        | [3/2>  | 7.92E-03  | -3.19E-03 | 7.29E-03        |
| [5/2>  | 3.26E-02  | -3.22E-02 | 2.10E-01        |        | [5/2>  | 1.45E-02  | -9.22E-03 | 2.95E-02        |
| [7/2>  | 4.91E-02  | -3.00E-02 | 3.31E-01        |        | [7/2>  | 1.73E-02  | -1.67E-02 | 5.80E-02        |
| [9/2>  | -1.01E-02 | -1.01E-03 | 1.03E-02        |        | [9/2>  | -3.64E-03 | 9.00E-05  | 1.32E-03        |
| [11/2> | 3.12E-02  | -1.43E-02 | 1.18E-01        |        | [11/2> | 1.38E-02  | -2.56E-03 | 1.97E-02        |
| [13/2> | 9.32E-02  | 9.27E-01  | 8.68E+01        |        | [13/2> | 3.69E-02  | 3.40E-01  | 1.17E+01        |
| [15/2> | 2.98E-04  | 0.00E+00  | 8.88E-06        |        | [15/2> | -7.90E-05 | 0.00E+00  | 6.24E-07        |
| KD2-1  | Re        | Im        | %               |        | KD2-2  | Re        | Im        | %               |
| ImJ>   |           |           |                 |        | ImJ>   |           |           |                 |
| -13/2> | 6.16E-04  | -3.05E-03 | 9.69E-04        |        | -13/2> | -3.04E-04 | 1.50E-03  | 2.35E-04        |
| -13/2  | 2.44E-02  | 2.55E-02  | 1.25E-01        |        | -13/2  | 4.17E-02  | 5.45E-02  | 4.71E-01        |
| -11/2> | 3.70E-02  | 4.56E-02  | 3.45E-01        |        | -11/2> | -7.99E-02 | -2.22E-02 | 6.87E-01        |
| -9/2>  | 4.03E-02  | 1.13E-02  | 1.75E-01        |        | -9/2>  | 2.64E-02  | 1.98E-02  | 1.09E-01        |
| -7/2>  | -3.86E-02 | -1.01E-02 | 1.59E-01        |        | -7/2>  | 3.02E-02  | -1.05E-02 | 1.02E-01        |
| -5/2>  | -2.79E-02 | 3.65E-02  | 2.84E-01        |        | -5/2>  | -6.46E-02 | 9.02E-03  | 1.78E-01        |
| -3/2>  | 1.10E-01  | 1.01E-01  | 2.24E+00        |        | -3/2>  | -1.58E-01 | -8.80E-02 | 3.26E+00        |
| -1/2>  | -4.37E-01 | 2.59E-01  | 2.58E+01        |        | -1/2>  | -6.54E-01 | 4.76E-01  | <b>6.54E+01</b> |
| [1/2>  | 5.96E-01  | -5.47E-01 | 6.54E+01        |        | [1/2>  | -3.40E-01 | 3.77E-01  | 2.58E+01        |
| [3/2>  | 5.51E-02  | 1.72E-01  | 3.26E+00        |        | [3/2>  | 7.74E-02  | 3.28E-02  | <b>2.48E+00</b> |
| [5/2>  | -4.96E-02 | -8.08E-02 | 8.99E-01        |        | [5/2>  | 2.64E-02  | 3.38E-02  | 1.84E-01        |
| [7/2>  | 1.62E-02  | -2.75E-02 | 1.02E-01        |        | [7/2>  | -2.21E-03 | -3.98E-02 | 1.59E-01        |
| [9/2>  | 1.42E-02  | 2.98E-02  | 1.09E-01        |        | [9/2>  | -3.13E-03 | -4.17E-02 | 1.75E-01        |
| [11/2> | 5.90E-03  | 8.27E-02  | 6.87E-01        |        | [11/2> | 3.74E-02  | 4.53E-02  | 3.45E-01        |
| [13/2> | 4.52E-02  | 4.16E-01  | 4.71E+01        |        | [13/2> | -2.02E-02 | -8.99E-02 | 1.25E-01        |
| [15/2> | -1.54E-03 | 0.00E+00  | 2.36E-04        |        | [15/2> | -3.11E-03 | 0.00E+00  | 9.69E-04        |
| KD3-1  | Re        | Im        | %               |        | KD3-2  | Re        | Im        | %               |
| ImJ>   |           |           |                 |        | ImJ>   |           |           |                 |
| -13/2> | -1.39E-03 | -4.58E-03 |                 |        | -13/2> | 2.22E-03  | 7.31E-03  | 5.84E-03        |
| -13/2  | -1.28E-02 | 7.00E-03  | 2.14E-02        |        | -13/2  | 2.44E-02  | -2.71E-03 | 6.03E-02        |
| -11/2> | -6.75E-02 | 9.37E-03  | 4.65E-01        |        | -11/2> | 2.24E-01  | 6.58E-02  | <b>5.44E+00</b> |
| -9/2>  | 1.05E-01  | 2.23E-02  | 1.15E+00        |        | -9/2>  | 9.02E-03  | -4.12E-02 | 1.28E-01        |
| -7/2>  | -8.06E-02 | 2.42E-02  | 7.09E-01        |        | -7/2>  | -3.32E-02 | -6.98E-02 | <b>5.97E-01</b> |
| -5/2>  | 1.56E-01  | -1.30E-01 | 4.13E+00        |        | -5/2>  | -7.57E-02 | -8.65E-02 | 1.32E+00        |
| -3/2>  | -1.87E-01 | 9.55E-03  | 3.51E+00        |        | -3/2>  | -8.57E-01 | 2.84E-01  | <b>8.16E+01</b> |
| -1/2>  | 9.08E-02  | 1.14E-03  | 8.71E-01        |        | -1/2>  | -1.14E-02 | -8.84E-02 | 1.27E-02        |
| [1/2>  | 2.30E-02  | -9.03E-01 | 8.16E+01        |        | [1/2>  | -4.51E-02 | -1.82E-01 | <b>3.51E+00</b> |
| [3/2>  | 1.05E-01  | 4.73E-02  | 1.32E+00        |        | [3/2>  | 7.92E-02  | -1.87E-01 | 4.13E+00        |
| [5/2>  | -7.64E-02 | -1.15E-02 | 5.97E-01        |        | [5/2>  | -1.95E-04 | -8.42E-02 | <b>7.09E-01</b> |
| [7/2>  | 3.68E-02  | -2.06E-02 | 3.78E-01        |        | [7/2>  | 2.80E-02  | 3.59E-02  | 2.90E-02        |
| [9/2>  | 1.28E-01  | 1.95E-01  | 5.44E+00        |        | [9/2>  | 5.18E-02  | 9.40E-02  | 1.15E+00        |
| [11/2> | -4.49E-03 | -2.42E-02 | <b>6.03E-02</b> |        | [11/2> | 1.06E-02  | 6.73E-02  | 4.65E-01        |
| [13/2> | 7.64E-03  | 0.00E+00  | 5.84E-03        |        | [13/2> | 2.98E-03  | -1.43E-02 | 2.14E-02        |
| [15/2> |           |           | 0.00E+00        |        | [15/2> | 4.78E-03  | 0.00E+00  | 2.29E-03        |
| KD4-1  | Re        | Im        | %               |        | KD4-2  | Re        | Im        | %               |
| ImJ>   |           |           |                 |        | ImJ>   |           |           |                 |
| -13/2> | 9.20E-03  | -2.40E-05 | 9.04E-07        |        | -13/2> | 5.98E-03  | -1.55E-03 | 3.81E-03        |
| -13/2  | 5.07E-05  | -2.39E-02 | 5.98E-02        |        | -13/2  | 1.54E-02  | 2.81E-02  | 1.03E-01        |
| -11/2> | 2.80E-01  | 6.23E-02  | 8.22E+00        |        | -11/2> | -4.93E-01 | 5.32E-01  | 5.26E+01        |
| -9/2>  | 2.02E-02  | 2.21E-02  | 8.98E-02        |        | -9/2>  | -1.17E-02 | 1.40E-01  | 1.98E+00        |
| -7/2>  | 1.46E-01  | 1.10E-02  | 2.13E+00        |        | -7/2>  | 2.80E-02  | 6.17E-02  | 4.60E-01        |
| -5/2>  | 1.99E-01  | -1.98E-01 | 7.87E+00        |        | -5/2>  | 1.57E-01  | 4.34E-01  | <b>2.13E+01</b> |
| -3/2>  | 1.07E-01  | -5.23E-03 | 1.14E+00        |        | -3/2>  | -6.47E-02 | 1.42E-01  | 2.42E+00        |
| -1/2>  | 5.60E-02  | -5.43E-02 | 6.09E-01        |        | -1/2>  | -5.81E-02 | -7.74E-02 | 9.37E-01        |
| [1/2>  | -3.68E-02 | 2.95E-02  | 9.37E-01        |        | [1/2>  | -7.78E-02 | 7.86E-02  | 5.09E-02        |
| [3/2>  | 9.81E-02  | 1.21E-01  | 2.42E+00        |        | [3/2>  | 1.05E-01  | -2.17E-02 | <b>1.14E+00</b> |
| [5/2>  | 4.35E-02  | -4.60E-01 | 2.13E+01        |        | [5/2>  | -2.42E-01 | -1.42E-01 | 7.87E+00        |
| [7/2>  | -1.17E-02 | 6.68E-02  | 4.60E-01        |        | [7/2>  | 1.38E-01  | -4.71E-02 | 2.13E+00        |
| [9/2>  | -4.64E-02 | -1.33E-01 | 1.98E+00        |        | [9/2>  | -1.40E-02 | 2.63E-02  | 5.98E-02        |
| [11/2> | 6.11E-01  | 3.92E-01  | 5.26E+01        |        | [11/2> | 2.55E-01  | -1.30E-01 | <b>8.22E+00</b> |
| [13/2> | 7.86E-03  | -3.10E-02 | 1.03E-01        |        | [13/2> | -1.09E-02 | -2.19E-02 | 5.98E-02        |
| [15/2> | -6.17E-03 | 0.00E+00  | 3.81E-03        |        | [15/2> | 9.50E-05  | 0.00E+00  | 9.03E-07        |
| KD5-1  | Re        | Im        | %               |        | KD5-2  | Re        | Im        | %               |
| ImJ>   |           |           |                 |        | ImJ>   |           |           |                 |
| -13/2> | -2.74E-03 | -2.96E-03 | 1.63E-03        |        | -13/2> | 2.82E-04  | 3.05E-04  | 1.73E-05        |
| -13/2  | -1.20E-02 | 1.72E-02  | 1.23E-01        |        | -13/2  | 2.97E-04  | 1.43E-03  | 1.34E-04        |
| -11/2> | 1.76E-01  | -4.64E-01 | 2.46E+01        |        | -11/2> | 2.19E-01  | -1.56E-02 | 4.84E+00        |
| -9/2>  | -1.05E-01 | -8.18E-03 | 1.10E+00        |        | -9/2>  | -6.61E-02 | 2.98E-02  | 5.26E-01        |
| -7/2>  | -1.26E-01 | 3.54E-02  | 1.71E+00        |        | -7/2>  | -6.84E-02 | 2.17E-01  | 5.17E+00        |
| -5/2>  | -4.92E-01 | 4.85E-01  | 4.87E+01        |        | -5/2>  | -2.11E-02 | 2.97E-01  | <b>8.84E+00</b> |
| -3/2>  | -1.26E-01 | -1.14E-01 | 2.89E+00        |        | -3/2>  | -1.59E-03 | 2.16E-02  | 4.71E-02        |
| -1/2>  | -2.86E-02 | 4.49E-02  | 2.83E-01        |        | -1/2>  | -9.39E-02 | -3.59E-02 | 1.01E-02        |
| [1/2>  | 9.02E-02  | 4.46E-02  | 1.01E+00        |        | [1/2>  | 1.36E-02  | -5.14E-02 | <b>2.83E-01</b> |
| [3/2>  | 1.48E-02  | 1.59E-02  | 4.71E-02        |        | [3/2>  | 1.69E-01  | 3.51E-02  | 2.89E-02        |
| [5/2>  | -2.03E-01 | 2.17E-01  | 8.84E+00        |        | [5/2>  | 6.97E-01  | 2.54E-02  | <b>4.87E+01</b> |
| [7/2>  | 1.13E-01  | -1.97E-01 | 5.17E+00        |        | [7/2>  | 5.95E-02  | 1.16E-01  | 1.71E+00        |
| [9/2>  | 2.30E-02  | 6.88E-02  | 5.26E-01        |        | [9/2>  | -7.70E-02 | -7.13E-02 | <b>1.10E+00</b> |
| [11/2> | 1.37E-01  | 1.72E-01  | 4.84E+00        |        | [11/2> | 2.21E-01  | 4.44E-01  | 2.46E+01        |
| [13/2> | -2.5E-03  | 1.3E-03   | 6.33E-04        |        | [13/2> | 2.91E-02  | -4.33E-02 | 2.72E-01        |
| [15/2> | 4.16E-04  | 0.00E+00  | 1.73E-05        |        | [15/2> | 4.03E-03  | 0.00E+00  | 1.63E-03        |
| KD6-1  | Re        | Im        | %               |        | KD6-2  | Re        | Im        | %               |
| ImJ>   |           |           |                 |        | ImJ>   |           |           |                 |
| -13/2> | 1.84E-02  | -5.09E-03 | 3.64E-02        |        | -13/2> | 4.00E-06  | -1.00E-06 | 1.70E-09        |
| -13/2  | -2.95E-02 | -3.74E-02 | 2.27E-01        |        | -13/2  | -6.40E-03 | 2.38E-02  | 6.09E-02        |
| -11/2> | 6.80E-02  | -1.22E-01 | 1.96E+00        |        | -11/2> | 8.36E-03  | -3.4E-03  | 8.87E-03        |
| -9/2>  | 1.80E-01  | 3.51E-01  | 3.36E+01        |        | -9/2>  | -1.12E-01 | 5.13E-02  | 1.52E+00        |
| -7/2>  | 6.96E-01  | -8.47E-02 | 4.91E+01        |        | -7/2>  | -1.74E-01 | -1.09E-01 | 4.21E+00        |
| -5/2>  | -8.98E-02 | 1.75E-01  | 3.89E+00        |        | -5/2>  | 7.13E-02  | 1.77E-01  | 3.64E+00        |
| -3/2>  | -7.53E-02 | -2.24E-02 | 6.17E-01        |        | -3/2>  | -6.87E-02 | -4.07E-02 | 6.38E-01        |
| -1/2>  | 2.45E-02  | 9.30E-03  | 6.89E-02        |        | -1/2>  | 9.29E-02  | 3.83E-02  | 3.65E-01        |
| [1/2>  | 3.48E-02  | -4.94E-02 | 3.65E-01        |        | [1/2>  | 2.12E-02  | -1.55E-02 | 6.89E-02        |
| [3/2>  | -5.54E-02 | 5.75E-02  | 6.38E-01        |        | [3/2>  | 7.86E-02  | 1.48E-03  | 6.17E-01        |
| [5/2>  | -2.15E-02 | 1.90E-01  | 3.64E+00        |        | [5/2>  | -1.33E-01 | -1.45E-01 | 3.89E+00        |
| [7/2>  | 1.38E-01  | 1.52E-01  | 4.21E+00        |        | [7/2>  | -6.93E-01 | 1.04E-01  | <b>4.91E+01</b> |
| [9/2>  |           |           |                 |        |        |           |           |                 |

| KD0-1   | Re        | Im        | %        | RAPDUK | KD0-2   | Re        | Im        | %        |
|---------|-----------|-----------|----------|--------|---------|-----------|-----------|----------|
| [mJ>    |           |           |          |        | [mJ>    |           |           |          |
| [-15/2> | -8.36E-01 | 5.48E-01  | 1.00E+02 |        | [-15/2> | 0.00E+00  | 0.00E+00  | 0.00E+00 |
| [-13/2  | 1.90E-05  | 4.30E-05  | 2.21E-07 |        | [-13/2  | 0.00E+00  | 0.00E+00  | 0.00E+00 |
| [-11/2> | 3.30E-04  | -1.10E-03 | 1.33E-04 |        | [-11/2> | 0.00E+00  | 0.00E+00  | 0.00E+00 |
| [-9/2>  | -5.11E-03 | -1.43E-03 | 2.81E-03 |        | [-9/2>  | 1.00E-06  | -1.00E-06 | 2.00E-10 |
| [-7/2>  | 9.08E-04  | -2.67E-03 | 7.96E-04 |        | [-7/2>  | 5.00E-06  | -4.00E-06 | 4.10E-09 |
| [-5/2>  | 2.99E-03  | 9.43E-04  | 9.83E-04 |        | [-5/2>  | -1.30E-05 | 1.00E-06  | 1.70E-08 |
| [-3/2>  | -9.24E-04 | 9.70E-05  | 8.63E-05 |        | [-3/2>  | -3.02E-03 | -8.51E-04 | 9.83E-04 |
| [-1/2>  | 3.20E-05  | 3.90E-05  | 2.55E-07 |        | [-1/2>  | -1.30E-05 | 1.10E-05  | 2.90E-08 |
| [1/2>   | 1.70E-05  | 2.00E-06  | 2.93E-08 |        | [1/2>   | 5.00E-06  | -5.00E-05 | 2.53E-07 |
| [3/2>   | -1.90E-05 | -3.00E-06 | 3.70E-08 |        | [3/2>   | 8.25E-04  | -4.25E-04 | 8.61E-05 |
| [5/2>   | 1.10E-05  | -7.00E-06 | 1.70E-08 |        | [5/2>   | 3.02E-03  | -8.51E-04 | 9.83E-04 |
| [7/2>   | 6.00E-06  | 1.00E-06  | 3.70E-09 |        | [7/2>   | -2.22E-03 | 1.74E-03  | 7.96E-04 |
| [9/2>   | -2.00E-06 | 0.00E+00  | 4.00E-10 |        | [9/2>   | -3.49E-03 | 3.99E-03  | 2.81E-03 |
| [11/2>  | 0.00E+00  | 0.00E+00  | 0.00E+00 |        | [11/2>  | -8.82E-04 | -7.43E-04 | 1.33E-04 |
| [13/2>  | 0.00E+00  | 0.00E+00  | 0.00E+00 |        | [13/2>  | -8.00E-06 | -4.60E-05 | 2.18E-07 |
| [15/2>  | 0.00E+00  | 0.00E+00  | 0.00E+00 |        | [15/2>  | 1.00E+00  | 0.00E+00  | 1.00E+02 |
|         |           |           |          |        |         |           |           |          |
| KD1-1   | Re        | Im        | %        |        | KD1-2   | Re        | Im        | %        |
| [mJ>    |           |           |          |        | [mJ>    |           |           |          |
| [-15/2> | 0.00E+00  | 0.00E+00  | 0.00E+00 |        | [-15/2> | -5.30E-05 | -2.00E-06 | 2.81E-07 |
| [-13/2  | -1.00E-02 | 5.92E-03  | 1.35E-02 |        | [-13/2  | 7.66E-01  | -6.42E-01 | 9.99E+01 |
| [-11/2> | 1.09E-04  | 2.60E-05  | 1.26E-06 |        | [-11/2> | -7.60E-03 | -6.00E-04 | 5.82E-03 |
| [-9/2>  | -4.00E-06 | -7.50E-05 | 5.64E-07 |        | [-9/2>  | 3.88E-03  | 6.11E-03  | 5.24E-03 |
| [-7/2>  | -2.24E-04 | -1.06E-04 | 6.14E-06 |        | [-7/2>  | 1.04E-02  | 1.73E-03  | 1.10E-02 |
| [-5/2>  | -5.80E-05 | -9.10E-05 | 1.16E-06 |        | [-5/2>  | -2.06E-03 | 8.00E-03  | 6.82E-03 |
| [-3/2>  | 9.80E-05  | -1.10E-04 | 2.17E-06 |        | [-3/2>  | -9.44E-03 | 4.28E-03  | 1.07E-02 |
| [-1/2>  | 2.10E-04  | -2.96E-04 | 1.32E-05 |        | [-1/2>  | 3.70E-03  | -8.64E-04 | 1.45E-03 |
| [1/2>   | 3.67E-03  | 1.01E-03  | 1.45E-03 |        | [1/2>   | -1.97E-04 | -3.05E-04 | 1.32E-05 |
| [3/2>   | 9.26E-03  | 4.66E-03  | 1.07E-02 |        | [3/2>   | 9.40E-05  | 1.13E-04  | 2.16E-06 |
| [5/2>   | -1.73E-03 | -8.07E-03 | 6.82E-03 |        | [5/2>   | 6.20E-05  | -8.90E-05 | 1.18E-06 |
| [7/2>   | -1.04E-02 | 1.31E-03  | 1.10E-02 |        | [7/2>   | -2.28E-04 | 9.70E-05  | 6.14E-06 |
| [9/2>   | 4.13E-03  | -9.94E-03 | 5.24E-03 |        | [9/2>   | 7.00E-06  | -7.50E-05 | 5.67E-07 |
| [11/2>  | 7.62E-03  | -2.90E-04 | 5.82E-03 |        | [11/2>  | 1.10E-04  | -2.20E-05 | 1.26E-06 |
| [13/2>  | 7.40E-01  | 6.73E-01  | 9.99E+01 |        | [13/2>  | 9.77E-03  | 6.32E-03  | 1.35E-02 |
| [15/2>  | 5.30E-05  | 0.00E+00  | 2.81E-07 |        | [15/2>  | 0.00E+00  | 0.00E+00  | 0.00E+00 |
|         |           |           |          |        |         |           |           |          |
| KD2-1   | Re        | Im        | %        |        | KD2-2   | Re        | Im        | %        |
| [mJ>    |           |           |          |        | [mJ>    |           |           |          |
| [-15/2> | 1.10E-03  | -7.19E-04 | 1.73E-04 |        | [-15/2> | -2.00E-06 | 1.00E-06  | 5.00E-10 |
| [-13/2  | -3.48E-03 | -6.73E-03 | 5.74E-03 |        | [-13/2  | 2.10E-03  | 1.90E-05  | 8.02E-08 |
| [-11/2> | 3.20E-01  | -9.45E-01 | 9.96E+01 |        | [-11/2> | 1.37E-03  | -5.64E-03 | 3.36E-03 |
| [-9/2>  | -2.68E-02 | 1.34E-02  | 8.98E-02 |        | [-9/2>  | 1.42E-03  | 7.92E-04  | 2.63E-04 |
| [-7/2>  | 3.10E-02  | 9.81E-03  | 1.06E-01 |        | [-7/2>  | 6.38E-04  | 5.00E-05  | 4.10E-05 |
| [-5/2>  | 1.41E-02  | 5.68E-03  | 2.30E-02 |        | [-5/2>  | 1.57E-04  | 8.91E-04  | 8.19E-05 |
| [-3/2>  | 4.87E-03  | 2.30E-02  | 5.54E-02 |        | [-3/2>  | -1.36E-03 | 2.37E-03  | 7.48E-04 |
| [-1/2>  | -1.69E-02 | 2.50E-02  | 9.08E-02 |        | [-1/2>  | -1.34E-02 | -3.09E-03 | 1.88E-02 |
| [1/2>   | 9.51E-03  | -9.90E-03 | 1.88E-02 |        | [1/2>   | -2.78E-02 | -1.17E-02 | 9.08E-02 |
| [3/2>   | 2.44E-03  | 1.24E-03  | 9.47E-03 |        | [3/2>   | 8.52E-03  | 3.19E-02  | 5.54E-02 |
| [5/2>   | 6.19E-04  | 6.59E-04  | 8.17E-05 |        | [5/2>   | 1.49E-02  | -2.94E-03 | 2.30E-02 |
| [7/2>   | 5.07E-04  | -3.90E-04 | 4.09E-05 |        | [7/2>   | -2.06E-02 | 2.52E-02  | 1.06E-01 |
| [9/2>   | -7.51E-04 | 1.44E-03  | 2.63E-04 |        | [9/2>   | -2.98E-02 | 3.46E-03  | 8.98E-02 |
| [11/2>  | 4.23E-03  | 3.97E-03  | 9.36E-03 |        | [11/2>  | -7.85E-01 | 6.78E-01  | 9.96E+01 |
| [13/2>  | -7.00E-06 | 2.80E-05  | 8.33E-08 |        | [13/2>  | 7.68E-04  | 7.53E-03  | 5.74E-03 |
| [15/2>  | -2.00E-06 | 0.00E+00  | 4.00E-10 |        | [15/2>  | -1.32E-03 | 0.00E+00  | 1.73E-04 |
|         |           |           |          |        |         |           |           |          |
| KD3-1   | Re        | Im        | %        |        | KD3-2   | Re        | Im        | %        |
| [mJ>    |           |           |          |        | [mJ>    |           |           |          |
| [-15/2> | -2.70E-05 | -2.10E-05 | 1.17E-07 |        | [-15/2> | -4.02E-03 | -3.20E-03 | 2.64E-03 |
| [-13/2  | 5.72E-04  | -1.80E-05 | 3.28E-05 |        | [-13/2  | -7.51E-03 | 1.86E-03  | 5.99E-03 |
| [-11/2> | 4.16E-03  | -7.39E-03 | 7.19E-03 |        | [-11/2> | 2.07E-02  | 1.80E-02  | 7.49E-02 |
| [-9/2>  | -8.37E-03 | 9.74E-03  | 1.65E-02 |        | [-9/2>  | -1.07E-02 | 9.50E-01  | 9.03E+01 |
| [-7/2>  | 1.01E-03  | 1.20E-02  | 1.46E-02 |        | [-7/2>  | 7.23E-02  | -6.51E-02 | 9.46E-01 |
| [-5/2>  | -2.37E-02 | 1.46E-02  | 7.76E-02 |        | [-5/2>  | -1.79E-01 | 8.79E-03  | 3.21E+00 |
| [-3/2>  | 4.84E-02  | 1.27E-02  | 2.60E-01 |        | [-3/2>  | -1.56E-02 | 2.74E-02  | 9.95E-02 |
| [-1/2>  | 1.16E-02  | 1.15E-01  | 1.59E+00 |        | [-1/2>  | -4.64E-02 | -1.78E-01 | 3.37E+00 |
| [1/2>   | -1.47E-01 | 1.10E-01  | 3.37E+00 |        | [1/2>   | 3.11E-02  | -1.22E-01 | 1.59E+00 |
| [3/2>   | -4.83E-03 | 3.12E-02  | 9.95E-02 |        | [3/2>   | 2.99E-02  | 4.01E-02  | 2.50E-01 |
| [5/2>   | -1.35E-01 | 1.18E-01  | 3.21E+00 |        | [5/2>   | 7.76E-02  | 3.40E-03  | 7.76E-02 |
| [7/2>   | -9.61E-02 | 9.59E-02  | 9.46E-01 |        | [7/2>   | -6.11E-02 | 1.01E-01  | 1.46E-02 |
| [9/2>   | 5.83E-01  | -7.50E-01 | 9.03E+01 |        | [9/2>   | 1.26E-02  | -2.41E-03 | 1.65E-02 |
| [11/2>  | -2.73E-02 | 1.19E-03  | 7.49E-02 |        | [11/2>  | -1.35E-03 | 8.37E-03  | 7.19E-03 |
| [13/2>  | -4.72E-03 | -6.13E-03 | 5.98E-03 |        | [13/2>  | -4.36E-04 | -3.71E-04 | 3.28E-05 |
| [15/2>  | 5.14E-03  | 0.00E+00  | 2.64E-03 |        | [15/2>  | -3.40E-05 | 0.00E+00  | 1.16E-07 |
|         |           |           |          |        |         |           |           |          |
| KD4-1   | Re        | Im        | %        |        | KD4-2   | Re        | Im        | %        |
| [mJ>    |           |           |          |        | [mJ>    |           |           |          |
| [-15/2> | 1.10E-05  | -1.19E-04 | 1.43E-06 |        | [-15/2> | -9.00E-05 | 1.01E-03  | 1.03E-04 |
| [-13/2  | 3.39E-04  | -6.55E-03 | 4.30E-03 |        | [-13/2  | 6.65E-04  | 1.45E-03  | 2.53E-04 |
| [-11/2> | -4.10E-03 | 4.04E-03  | 3.31E-03 |        | [-11/2> | -8.32E-03 | -2.97E-02 | 9.53E-02 |
| [-9/2>  | -9.50E-03 | 1.01E-01  | 1.02E+00 |        | [-9/2>  | 6.13E-02  | -1.78E-01 | 3.55E+00 |
| [-7/2>  | -1.87E-01 | 4.22E-02  | 3.70E+00 |        | [-7/2>  | 1.23E-01  | 2.98E-02  | 1.61E+00 |
| [-5/2>  | 1.36E-01  | 1.28E-01  | 3.49E+00 |        | [-5/2>  | -1.27E-01 | 2.27E-02  | 1.65E+00 |
| [-3/2>  | 3.62E-02  | -4.85E-01 | 2.37E+01 |        | [-3/2>  | -3.76E-02 | -2.06E-01 | 4.39E+00 |
| [-1/2>  | -2.36E-01 | 3.85E-01  | 2.04E+01 |        | [-1/2>  | 4.11E-02  | -6.02E-01 | 3.64E+01 |
| [1/2>   | 1.63E-01  | 1.23E-02  | 3.46E+01 |        | [1/2>   | 4.02E-01  | -2.01E-01 | 2.94E+01 |
| [3/2>   | -2.02E-01 | -5.57E-02 | 4.49E+00 |        | [3/2>   | 4.87E-01  | 6.89E-03  | 2.37E+01 |
| [5/2>   | -3.38E-02 | 1.24E-01  | 1.65E+00 |        | [5/2>   | 1.15E-01  | 1.47E-01  | 3.49E+00 |
| [7/2>   | 4.06E-02  | -1.20E-01 | 1.61E+00 |        | [7/2>   | 2.75E-02  | 1.90E-01  | 3.70E+00 |
| [9/2>   | 1.83E-01  | 4.53E-02  | 3.55E+00 |        | [9/2>   | 1.01E-01  | -5.59E-04 | 1.02E+00 |
| [11/2>  | -2.89E-02 | 1.09E-02  | 9.53E-02 |        | [11/2>  | -4.39E-03 | 3.73E-03  | 3.31E-03 |
| [13/2>  | 1.50E-03  | -5.34E-04 | 2.53E-04 |        | [13/2>  | -6.55E-03 | -2.42E-04 | 4.30E-03 |
| [15/2>  | 1.02E-03  | 0.00E+00  | 1.03E-04 |        | [15/2>  | 1.20E-04  | 0.00E+00  | 1.44E-06 |
|         |           |           |          |        |         |           |           |          |
| KD5-1   | Re        | Im        | %        |        | KD5-2   | Re        | Im        | %        |
| [mJ>    |           |           |          |        | [mJ>    |           |           |          |
| [-15/2> | -1.36E-04 | -5.05E-04 | 2.74E-05 |        | [-15/2> | 3.22E-04  | 1.19E-03  | 1.53E-04 |
| [-13/2  | 3.95E-03  | 6.66E-03  | 6.60E-03 |        | [-13/2  | -9.79E-04 | 4.58E-03  | 2.20E-03 |
| [-11/2> | 1.87E-02  | 3.02E-02  | 1.26E-01 |        | [-11/2> | -1.68E-02 | 1.10E-03  | 2.82E-02 |
| [-9/2>  | -8.09E-02 | -2.20E-02 | 7.02E-01 |        | [-9/2>  | 3.34E-02  | -1.67E-01 | 2.89E+00 |
| [-7/2>  | -4.23E-01 | 1.83E-01  | 2.13E+01 |        | [-7/2>  | 2.24E-01  | -2.18E-02 | 5.06E+00 |
| [-5/2>  | -2.92E-02 | 1.28E-01  | 1.73E+00 |        | [-5/2>  | -2.46E-01 | 6.20E-02  | 6.45E+00 |
| [-3/2>  | 1.70E-01  | 5.13E-01  | 2.92E+01 |        | [-3/2>  | -8.40E-02 | 2.54E-01  | 7.18E+00 |
| [-1/2>  | 7.81E-02  | -2.73E-01 | 8.07E+00 |        | [-1/2>  | -2.71E-01 | -3.16E-01 | 1.73E+01 |
| [1/2>   | -3.76E-01 | 1.79E-01  | 1.73E+01 |        | [1/2>   | 2.43E-01  | -1.47E-01 | 8.07E+00 |
| [3/2>   | -2.24E-01 | 1.47E-01  | 7.18E+00 |        | [3/2>   | -4.51E-01 | 2.97E-01  | 2.92E+01 |
| [5/2>   | -4.28E-03 | 2.54E-01  | 6.45E+00 |        | [5/2>   | 1.16E-01  | 6.17E-02  | 1.73E+00 |
| [7/2>   | -3.74E-02 | -2.22E-01 | 5.06E+00 |        | [7/2>   | -2.87E-01 | -3.61E-01 | 2.13E+01 |
| [9/2>   | -1.52E-01 | 7.57E-02  | 2.89E+00 |        | [9/2>   | 4.23E-02  | 7.23E-02  | 7.02E-01 |
| [11/2>  | 3.31E-03  | 1.65E-02  | 2.82E-02 |        | [11/2>  | -2.43E-02 | 2.59E-02  | 1.26     |

| KD0-1               | Re        | Im        | %        | FICBOL | KD0-2               | Re        | Im        | %        |
|---------------------|-----------|-----------|----------|--------|---------------------|-----------|-----------|----------|
| $ \text{mJ}\rangle$ |           |           |          |        | $ \text{mJ}\rangle$ |           |           |          |
| -15/2>              | 8.58E-01  | 5.13E-01  | 1.00E+02 |        | -15/2>              | 0.00E+00  | 0.00E+00  | 0.00E+00 |
| -13/2>              | -1.26E-04 | 8.50E-05  | 2.31E-06 |        | -13/2>              | 1.00E-05  | 1.60E-05  | 3.56E-08 |
| -11/2>              | -7.40E-03 | -1.13E-03 | 5.61E-03 |        | -11/2>              | 2.00E-06  | 0.00E+00  | 4.00E-10 |
| -9/2>               | 1.49E-02  | 8.61E-03  | 2.95E-02 |        | -9/2>               | 1.82E-04  | 1.04E-04  | 4.39E-06 |
| -7/2>               | 5.18E-03  | 1.23E-04  | 2.68E-03 |        | -7/2>               | 7.00E-05  | 7.00E-05  | 1.95E-08 |
| -5/2>               | 2.38E-04  | -4.10E-05 | 5.83E-06 |        | -5/2>               | 1.50E-04  | -1.29E-04 | 3.91E-06 |
| -3/2>               | -8.13E-03 | -2.40E-03 | 7.18E-03 |        | -3/2>               | 4.48E-04  | 1.12E-04  | 2.13E-05 |
| -1/2>               | 1.55E-04  | -9.00E-06 | 4.41E-06 |        | -1/2>               | 2.36E-04  | 1.97E-04  | 9.45E-06 |
| 1/2>                | 3.04E-04  | -4.80E-05 | 9.47E-06 |        | 1/2>                | 1.28E-04  | 8.70E-05  | 2.40E-06 |
| 3/2>                | -4.42E-04 | -1.34E-04 | 2.13E-05 |        | 3/2>                | 8.21E-03  | -2.11E-03 | 7.18E-03 |
| 5/2>                | -1.95E-04 | 3.40E-05  | 3.92E-06 |        | 5/2>                | -1.83E-04 | -1.57E-04 | 5.81E-06 |
| 7/2>                | 1.40E-05  | 0.00E+00  | 1.96E-08 |        | 7/2>                | 4.31E-03  | 2.55E-03  | 2.68E-03 |
| 9/2>                | 2.09E-04  | 4.00E-06  | 4.37E-06 |        | 9/2>                | 1.72E-02  | -2.34E-04 | 2.95E-02 |
| 11/2>               | -1.00E-06 | -1.00E-06 | 2.00E-10 |        | 11/2>               | 6.93E-03  | -2.83E-03 | 5.61E-03 |
| 13/2>               | -1.70E-05 | 8.00E-06  | 3.53E-08 |        | 13/2>               | 6.40E-05  | 1.37E-04  | 2.29E-06 |
| 15/2>               | 0.00E+00  | 0.00E+00  | 0.00E+00 |        | 15/2>               | 1.00E+00  | 0.00E+00  | 1.00E+02 |
| KD1-1               | Re        | Im        | %        |        | KD1-2               | Re        | Im        | %        |
| $ \text{mJ}\rangle$ |           |           |          |        | $ \text{mJ}\rangle$ |           |           |          |
| -15/2>              | -1.37E-04 | 2.40E-05  | 1.93E-06 |        | -15/2>              | 1.88E-04  | -3.30E-05 | 3.64E-06 |
| -13/2>              | -1.68E-01 | 1.15E-01  | 4.14E+00 |        | -13/2>              | 6.30E-01  | 7.46E-01  | 9.53E+01 |
| -11/2>              | 6.13E-03  | 3.17E-03  | 4.76E-03 |        | -11/2>              | 3.77E-02  | -1.95E-02 | 1.80E-01 |
| -9/2>               | 7.20E-03  | 1.02E-03  | 5.28E-03 |        | -9/2>               | 3.06E-02  | -1.42E-02 | 1.14E-01 |
| -7/2>               | -9.94E-03 | 4.07E-03  | 4.10E-03 |        | -7/2>               | 2.38E-02  | 1.40E-02  | 7.13E-02 |
| -5/2>               | -4.99E-03 | 1.15E-03  | 2.62E-03 |        | -5/2>               | 1.42E-02  | 5.95E-03  | 2.38E-02 |
| -3/2>               | -2.71E-03 | 8.79E-04  | 8.09E-04 |        | -3/2>               | -6.96E-04 | 3.37E-04  | 5.98E-05 |
| -1/2>               | 9.50E-03  | 1.15E-03  | 9.16E-03 |        | -1/2>               | 2.86E-02  | -2.05E-02 | 1.24E-01 |
| 1/2>                | 2.47E-02  | 2.51E-02  | 4.80E-02 |        | 1/2>                | 2.17E-03  | 1.75E-03  | 7.13E-03 |
| 3/2>                | -7.44E-04 | 2.13E-04  | 5.99E-05 |        | 3/2>                | 2.82E-03  | 4.05E-04  | 8.09E-04 |
| 5/2>                | -1.30E-02 | 8.29E-03  | 2.38E-02 |        | 5/2>                | -5.12E-03 | -2.81E-04 | 2.62E-03 |
| 7/2>                | 2.12E-02  | 2.87E-02  | 1.27E-01 |        | 7/2>                | 4.18E-03  | -4.86E-03 | 4.10E-03 |
| 9/2>                | 2.78E-02  | 1.92E-02  | 1.14E-01 |        | 9/2>                | 6.92E-03  | 5.23E-03  | 5.29E-03 |
| 11/2>               | -3.38E-02 | 2.56E-02  | 1.80E-01 |        | 11/2>               | 5.50E-03  | 4.17E-03  | 4.76E-03 |
| 13/2>               | -4.93E-01 | 8.42E-01  | 9.53E+01 |        | 13/2>               | -1.46E-01 | 1.42E-01  | 4.14E+00 |
| 15/2>               | 1.91E-04  | 0.00E+00  | 3.65E-06 |        | 15/2>               | 1.39E-04  | 0.00E+00  | 1.93E-06 |
| KD2-1               | Re        | Im        | %        |        | KD2-2               | Re        | Im        | %        |
| $ \text{mJ}\rangle$ |           |           |          |        | $ \text{mJ}\rangle$ |           |           |          |
| -15/2>              | 3.73E-04  | -9.80E-03 | 9.62E-03 |        | -15/2>              | 8.00E-06  | 2.11E-04  | 4.46E-06 |
| -13/2>              | 9.12E-03  | 3.90E-02  | 1.60E-01 |        | -13/2>              | 7.11E-03  | -6.82E-03 | 9.71E-03 |
| -11/2>              | -1.36E-01 | -9.61E-01 | 9.42E+01 |        | -11/2>              | 6.53E-03  | 1.19E-02  | 1.84E-02 |
| -9/2>               | 7.23E-02  | 9.74E-02  | 1.47E+00 |        | -9/2>               | 1.17E-02  | -2.00E-02 | 5.38E-02 |
| -7/2>               | 5.60E-02  | 9.04E-02  | 1.13E+00 |        | -7/2>               | 9.32E-03  | 5.43E-03  | 1.16E-02 |
| -5/2>               | -6.06E-02 | 6.04E-02  | 4.58E-01 |        | -5/2>               | 1.60E-02  | 2.14E-02  | 7.13E-02 |
| -3/2>               | -3.25E-02 | -4.78E-02 | 3.35E-01 |        | -3/2>               | 1.72E-02  | -1.36E-02 | 4.80E-02 |
| -1/2>               | 1.67E-03  | 4.84E-03  | 2.62E-03 |        | -1/2>               | -1.29E-01 | -6.27E-02 | 2.05E+00 |
| 1/2>                | 5.78E-02  | 1.31E-01  | 2.05E+00 |        | 1/2>                | 4.77E-03  | 1.85E-03  | 2.62E-03 |
| 3/2>                | -1.29E-02 | 1.77E-02  | 4.80E-02 |        | 3/2>                | 4.43E-02  | 3.41E-02  | 2.35E-01 |
| 5/2>                | -2.07E-02 | -1.68E-02 | 7.13E-02 |        | 5/2>                | -5.91E-02 | -3.29E-02 | 4.58E-01 |
| 7/2>                | 5.07E-03  | 9.52E-03  | 1.16E-02 |        | 7/2>                | -8.82E-02 | -5.94E-02 | 1.13E+00 |
| 9/2>                | 1.96E-02  | 1.24E-02  | 5.37E-02 |        | 9/2>                | 4.46E-02  | 7.59E-02  | 1.47E+00 |
| 11/2>               | 1.21E-02  | -6.08E-03 | 1.84E-02 |        | 11/2>               | 9.55E-01  | 7.73E-01  | 9.25E+01 |
| 13/2>               | 6.54E-03  | 7.37E-03  | 9.71E-03 |        | 13/2>               | -3.93E-02 | 7.63E-03  | 1.60E-01 |
| 15/2>               | 2.11E-04  | 0.00E+00  | 4.45E-06 |        | 15/2>               | 9.81E-03  | 0.00E+00  | 9.62E-03 |
| KD3-1               | Re        | Im        | %        |        | KD3-2               | Re        | Im        | %        |
| $ \text{mJ}\rangle$ |           |           |          |        | $ \text{mJ}\rangle$ |           |           |          |
| -15/2>              | -1.02E-02 | -9.46E-04 | 1.06E-02 |        | -15/2>              | -3.59E-03 | -3.32E-04 | 1.30E-03 |
| -13/2>              | 4.26E-02  | 1.58E-02  | 2.06E-01 |        | -13/2>              | 3.30E-03  | -9.90E-03 | 1.09E-02 |
| -11/2>              | 8.15E-02  | 3.62E-02  | 7.96E-02 |        | -11/2>              | 8.83E-02  | 6.77E-02  | 1.24E+00 |
| -9/2>               | 6.93E-01  | 8.93E-02  | 4.89E+01 |        | -9/2>               | 7.87E-03  | -1.45E-01 | 2.12E+00 |
| -7/2>               | -1.36E-01 | 6.75E-02  | 2.32E+00 |        | -7/2>               | 1.71E-01  | -7.46E-01 | 5.71E+00 |
| -5/2>               | -3.08E-01 | 8.12E-02  | 1.02E+01 |        | -5/2>               | 6.91E-02  | 5.10E-02  | 7.38E-01 |
| -3/2>               | 7.27E-02  | -3.91E-03 | 3.50E-02 |        | -3/2>               | -4.39E-01 | -1.51E-01 | 2.15E+01 |
| -1/2>               | 2.07E-01  | -6.32E-02 | 4.68E+00 |        | -1/2>               | 7.08E-02  | -7.54E-02 | 1.07E+00 |
| 1/2>                | -6.35E-02 | -8.16E-02 | 1.07E+00 |        | 1/2>                | 2.00E-01  | 8.20E-02  | 4.68E+00 |
| 3/2>                | -4.51E-01 | 1.10E-01  | 2.15E+01 |        | 3/2>                | 7.20E-02  | -1.06E-02 | 5.30E-01 |
| 5/2>                | 6.41E-02  | 5.72E-02  | 7.38E-02 |        | 5/2>                | 2.99E-01  | 3.09E-01  | 1.10E+01 |
| 7/2>                | 1.85E-01  | -1.51E-01 | 5.71E+00 |        | 7/2>                | 1.30E-01  | 7.97E-02  | 2.32E+00 |
| 9/2>                | 5.54E-03  | -1.45E-01 | 2.12E+00 |        | 9/2>                | 6.99E-01  | -2.51E-02 | 4.89E+01 |
| 11/2>               | 9.41E-02  | -5.93E-02 | 1.24E+00 |        | 11/2>               | 8.45E-02  | 2.85E-02  | 7.96E-01 |
| 13/2>               | -2.37E-03 | 1.09E-02  | 1.09E-02 |        | 13/2>               | 4.39E-02  | 1.85E-02  | 2.06E-01 |
| 15/2>               | -3.61E-03 | 0.00E+00  | 1.30E-03 |        | 15/2>               | 1.03E-02  | 0.00E+00  | 1.06E-02 |
| KD4-1               | Re        | Im        | %        |        | KD4-2               | Re        | Im        | %        |
| $ \text{mJ}\rangle$ |           |           |          |        | $ \text{mJ}\rangle$ |           |           |          |
| -15/2>              | -2.20E-03 | 3.96E-03  | 2.06E-03 |        | -15/2>              | 1.10E-05  | -2.00E-05 | 5.21E-08 |
| -13/2>              | -1.40E-02 | 1.41E-02  | 3.94E-02 |        | -13/2>              | 1.34E-03  | -4.10E-05 | 1.79E-04 |
| -11/2>              | 7.08E-03  | -4.56E-03 | 7.09E-03 |        | -11/2>              | 1.36E-01  | 3.72E-02  | 1.99E+00 |
| -9/2>               | 1.81E-01  | 1.93E-01  | 7.50E+00 |        | -9/2>               | 2.10E-02  | 1.30E-02  | 1.40E+00 |
| -7/2>               | -6.39E-02 | 1.09E-01  | 1.59E+00 |        | -7/2>               | 1.29E-01  | 7.00E-02  | 2.24E+00 |
| -5/2>               | 1.33E-01  | -9.66E-02 | 2.69E+00 |        | -5/2>               | 2.62E-02  | 5.74E-02  | 3.99E-01 |
| -3/2>               | 6.50E-02  | 8.62E-02  | 1.16E+00 |        | -3/2>               | 1.75E-01  | -1.05E-01 | 4.17E+00 |
| -1/2>               | -4.81E-01 | 7.32E-01  | 7.65E+00 |        | -1/2>               | 7.27E-02  | 3.99E-03  | 2.95E-02 |
| 1/2>                | -3.06E-02 | -1.25E-02 | 1.10E-01 |        | 1/2>                | 8.73E-01  | -6.52E-02 | 7.67E+01 |
| 3/2>                | -1.77E-01 | 1.02E-01  | 4.17E+00 |        | 3/2>                | -4.37E-02 | -9.87E-02 | 1.16E+00 |
| 5/2>                | -3.74E-02 | -5.08E-02 | 3.99E-01 |        | 5/2>                | 1.44E-01  | 6.89E-02  | 2.69E+00 |
| 7/2>                | 4.06E-03  | 1.50E-01  | 2.24E+00 |        | 7/2>                | 1.26E-01  | 1.09E-03  | 1.59E+00 |
| 9/2>                | 9.12E-02  | -7.57E-02 | 1.40E+00 |        | 9/2>                | -2.67E-01 | 5.83E-02  | 7.50E+00 |
| 11/2>               | -3.36E-02 | 1.37E-01  | 1.99E+00 |        | 11/2>               | 7.43E-03  | -3.97E-03 | 7.09E-03 |
| 13/2>               | 6.86E-04  | -1.15E-03 | 1.80E-04 |        | 13/2>               | 1.91E-02  | -5.42E-03 | 3.94E-02 |
| 15/2>               | -2.30E-05 | 0.00E+00  | 5.29E-08 |        | 15/2>               | -4.34E-03 | 0.00E+00  | 2.06E-03 |
| KD5-1               | Re        | Im        | %        |        | KD5-2               | Re        | Im        | %        |
| $ \text{mJ}\rangle$ |           |           |          |        | $ \text{mJ}\rangle$ |           |           |          |
| -15/2>              | -1.71E-03 | 8.12E-03  | 6.89E-03 |        | -15/2>              | 6.17E-04  | 2.94E-03  | 9.02E-04 |
| -13/2>              | 3.15E-03  | -6.43E-03 | 5.12E-03 |        | -13/2>              | 2.13E-02  | 7.01E-03  | 5.01E-02 |
| -11/2>              | 2.16E-02  | -5.66E-03 | 5.00E-02 |        | -11/2>              | 1.79E-02  | -3.19E-02 | 1.34E-01 |
| -9/2>               | 1.30E-01  | -3.40E-01 | 1.32E+01 |        | -9/2>               | 1.28E-01  | 2.90E-02  | 1.73E+00 |
| -7/2>               | 1.72E-01  | 1.78E-01  | 6.00E+00 |        | -7/2>               | 1.48E-01  | -1.80E-01 | 2.43E+00 |
| -5/2>               | 9.03E-02  | -3.04E-01 | 1.01E+01 |        | -5/2>               | 3.71E-01  | -1.79E-01 | 1.70E+01 |
| -3/2>               | 2.69E-01  | 1.71E-01  | 1.01E+01 |        | -3/2>               | 6.93E-02  | 1.86E-01  | 3.94E+00 |
| -1/2>               | 5.40E-02  | -2.59E-01 | 7.01E+00 |        | -1/2>               | 2.21E-01  | 8.18E-00  | 5.34E+00 |
| 1/2>                | -1.25E-01 | 1.99E-01  | 5.54E+00 |        | 1/2>                | 2.65E-01  | -7.71E-04 | 7.01E+00 |
| 3/2>                | -1.68E-01 | 1.06E-01  | 3.94E+00 |        | 3/2>                | 1.12E-01  | 2.98E-01  | 1.01E+01 |
| 5/2>                | -2.52E-01 | 3.27E-01  | 1.70E+01 |        | 5/2>                | 3.16E-01  | -2.58E-02 | 1.01E+01 |
| 7/2>                | 8.05E-02  | 4.91E-01  | 2.48E+01 |        | 7/2>                | -2.11E-01 | 1.36E-01  | 6.30E+00 |
| 9/2>                | 1.99E-03  | 1.33E-01  | 1.73E+00 |        | 9/2>                | 3.92E-01  | 7.74E-02  | 1.32E+01 |
| 11/2>               | 2.76E-02  | 2.41E-02  | 1.34E-01 |        | 11/2>               | -9.99E-03 | 2.00E-02  | 5.00E-02 |
| 13/2>               | 2.48E-03  | 2.23E-02  | 5.01E-02 |        | 13/2>               | 6.94E-03  | -1.76E-03 | 5.12E-03 |
| 15/2>               | -3.00E-03 | 0.00E+00  | 9.02E-04 |        | 15/2>               | 8.30E-03  | 0.00E+00  | 6.89E-03 |
| KD6-1               | Re        | Im        | %        |        | KD6-2               | Re        | Im        | %        |
| $ \text{mJ}\rangle$ |           |           |          |        | $ \text{mJ}\rangle$ |           |           |          |
| -15/2>              | -2.28E-04 | -6.27E-04 | 4.45E-05 |        | -15/2>              | 3.11E-03  | 8.54E-03  | 8.26E-03 |
| -13/2>              | 3.04E-03  | 1.39E-02  | 2.01E-02 |        | -13/2>              | 7.68E-03  | -1.57E-02 | 3.06E-02 |
| -11/2>              | 2.68E-02  | -3.67E-02 | 2.06E-01 |        | -11/2>              | 1.06E-02  | -7.48E-02 | 5.70E-01 |
| -9/2>               | 2.20E-01  | 1.17E-01  | 6.23E+00 |        | -9/2>               | 1.06E-01  | -2.90E-01 | 9.54E+00 |
| -7/2>               | 9.84E-02  | -2.62E-01 | 7.81E+00 |        | -7/2>               | 3.10E-03  | 3.67E-02  | 1.38E-01 |
| -5/2>               | -1.97E-01 | 3.12E-01  | 1.36E+01 |        | -5/2>               | 3.09E-02  | 2.38E-01  | 5.75E+00 |
| -3/2>               | 4.90E-01  | -4.61E-02 | 2.42E+01 |        | -3/2>               | 2.37E-01  | 4.89E-01  | 2.96E+01 |
| -1/2>               | -6.09E-02 | 8.96E-02  | 1.17E+00 |        | -1/2>               | 1.04E-01  | 2.18E-02  | 1.13E+00 |
| 1/2>                | -5.61E-02 | -9.05E-02 | 1.13E+00 |        | 1/2>                | 6.33E-02  | -8.79E-02 | 1.17E+00 |
| 3/2>                | -4.21E-01 | 5.57E-02  | 2.96E+01 |        | 3/2>                | 1.24E-01  | -7.66E-01 | 1.42E+01 |
| 5/2>                | -2.34E-01 | 5.23E-02  | 5.75E+00 |        | 5/2>                | 2.25E-01  | -2.91E-01 | 1.36E+01 |
| 7/2>                | 3.28E-02  | -1.74E-02 |          |        |                     |           |           |          |

| KD0-1  | Re        | Im        | %        | IMOTUB | KD0-2  | Re        | Im        | %        |
|--------|-----------|-----------|----------|--------|--------|-----------|-----------|----------|
| [mJ>   |           |           |          |        | [mJ>   |           |           |          |
| -15/2> | 0.00E+00  | 0.00E+00  | 0.00E+00 |        | -15/2> | 1.00E+00  | 2.53E-03  | 9.99E+01 |
| -13/2> | -3.50E-05 | 0.00E+00  | 1.23E-07 |        | -13/2> | 8.70E-05  | 0.00E+00  | 7.57E-07 |
| -11/2> | 1.10E-05  | 0.00E+00  | 1.21E-08 |        | -11/2> | -1.13E-02 | -3.40E-05 | 1.28E-02 |
| -9/2>  | -3.34E-04 | 0.00E+00  | 5.40E-06 |        | -9/2>  | -2.44E-02 | 6.40E-02  | 2.78E-02 |
| -7/2>  | -9.90E-05 | 0.00E+00  | 9.80E-07 |        | -7/2>  | 2.17E-03  | 0.00E-06  | 4.73E-04 |
| -5/2>  | -1.34E-04 | 0.00E+00  | 1.80E-06 |        | -5/2>  | -2.50E-03 | -7.00E-06 | 6.24E-04 |
| -3/2>  | 7.04E-04  | 0.00E+00  | 4.96E-05 |        | -3/2>  | -8.64E-03 | -2.60E-05 | 7.47E-03 |
| -1/2>  | -4.51E-04 | 0.00E+00  | 2.28E-06 |        | -1/2>  | 1.51E-04  | 0.00E+00  | 2.08E-06 |
| 1/2>   | -1.51E-04 | 0.00E+00  | 2.28E-06 |        | 1/2>   | 4.51E-04  | 2.00E-06  | 2.03E-05 |
| 3/2>   | -8.65E-03 | 4.00E-06  | 7.47E-03 |        | 3/2>   | -7.04E-04 | 2.00E-06  | 4.96E-05 |
| 5/2>   | 2.50E-03  | -1.00E-06 | 6.24E-04 |        | 5/2>   | -1.34E-04 | 0.00E+00  | 1.80E-06 |
| 7/2>   | 2.17E-03  | 0.00E+00  | 4.73E-04 |        | 7/2>   | 9.90E-05  | 0.00E+00  | 9.80E-07 |
| 9/2>   | -2.40E-03 | 3.00E-06  | 5.71E-02 |        | 9/2>   | 2.34E-04  | 1.00E-06  | 5.48E-06 |
| 11/2>  | -1.13E-02 | 6.00E-06  | 1.28E-02 |        | 11/2>  | -1.10E-05 | 0.00E+00  | 1.21E-08 |
| 13/2>  | -8.70E-05 | 0.00E+00  | 7.57E-07 |        | 13/2>  | -3.50E-05 | 0.00E+00  | 1.23E-07 |
| 15/2>  | 1.00E+00  | 0.00E+00  | 9.99E+01 |        | 15/2>  | 0.00E+00  | 0.00E+00  | 0.00E+00 |
| KD1-1  | Re        | Im        | %        |        | KD1-2  | Re        | Im        | %        |
| [mJ>   |           |           |          |        | [mJ>   |           |           |          |
| -15/2> | -1.29E-03 | 0.00E+00  | 1.67E-04 |        | -15/2> | 5.30E-05  | 0.00E+00  | 2.81E-07 |
| -13/2> | -9.88E-01 | 1.20E-05  | 9.77E+01 |        | -13/2> | -1.20E-01 | 1.83E-04  | 1.45E+00 |
| -11/2> | 9.16E-03  | -5.00E-06 | 8.39E-03 |        | -11/2> | 4.72E-03  | -5.00E-06 | 2.23E-03 |
| -9/2>  | 6.66E-02  | 2.00E-05  | 4.43E-01 |        | -9/2>  | 7.27E-03  | -9.00E-06 | 5.29E-03 |
| -7/2>  | -4.92E-02 | 4.00E-06  | 2.43E-01 |        | -7/2>  | -8.16E-03 | 1.00E-05  | 6.66E-03 |
| -5/2>  | -1.47E-02 | -4.00E-06 | 2.18E-02 |        | -5/2>  | 2.09E-03  | 1.00E-06  | 4.36E-04 |
| -3/2>  | 7.94E-03  | 1.00E-06  | 6.30E-03 |        | -3/2>  | 7.15E-03  | -5.00E-06 | 5.11E-03 |
| -1/2>  | 3.92E-02  | 1.80E-05  | 1.54E-01 |        | -1/2>  | 2.95E-03  | -5.00E-06 | 8.71E-04 |
| 1/2>   | -7.15E-03 | 6.00E-06  | 5.11E-03 |        | 1/2>   | -2.49E-02 | 1.00E-05  | 4.43E-01 |
| 3/2>   | 2.09E-03  | 0.00E+00  | 4.36E-04 |        | 3/2>   | 7.94E-03  | 0.00E+00  | 6.30E-03 |
| 5/2>   | 8.16E-03  | 1.10E-05  | 6.66E-03 |        | 5/2>   | 1.47E-02  | -3.00E-06 | 2.18E-02 |
| 7/2>   | -4.72E-03 | 6.00E-06  | 2.23E-03 |        | 7/2>   | -4.92E-02 | -2.00E-06 | 2.43E-01 |
| 9/2>   | -1.20E-01 | -1.98E-04 | 1.45E+00 |        | 9/2>   | -6.66E-02 | 1.10E-05  | 4.43E-01 |
| 11/2>  | -5.30E-05 | 0.00E+00  | 2.81E-07 |        | 11/2>  | 9.16E-03  | 6.00E-06  | 8.39E-03 |
| 13/2>  |           |           |          |        | 13/2>  | 9.88E-01  | 1.14E-04  | 9.77E+01 |
| 15/2>  |           |           |          |        | 15/2>  | -1.29E-03 | 0.00E+00  | 1.67E-04 |
| KD2-1  | Re        | Im        | %        |        | KD2-2  | Re        | Im        | %        |
| [mJ>   |           |           |          |        | [mJ>   |           |           |          |
| -15/2> | -1.26E-02 | 3.50E-05  | 1.58E-02 |        | -15/2> | 5.40E-05  | 0.00E+00  | 2.92E-07 |
| -13/2> | -1.80E-02 | 3.30E-05  | 3.25E-02 |        | -13/2> | 2.10E-02  | 2.10E-05  | 2.78E-02 |
| -11/2> | -9.49E-01 | 2.20E-03  | 9.01E+01 |        | -11/2> | -7.23E-02 | 6.30E-05  | 5.22E-01 |
| -9/2>  | 1.44E-02  | -4.90E-05 | 2.08E-02 |        | -9/2>  | -3.61E-02 | 4.50E-05  | 1.30E-01 |
| -7/2>  | 2.22E-01  | -4.63E-04 | 4.94E+00 |        | -7/2>  | 3.16E-02  | -2.50E-05 | 9.97E-02 |
| -5/2>  | -7.18E-02 | 1.74E-04  | 5.15E-01 |        | -5/2>  | -5.90E-02 | 5.90E-05  | 1.50E-01 |
| -3/2>  | -8.41E-02 | 1.70E-04  | 7.08E-01 |        | -3/2>  | -1.92E-02 | 1.20E-05  | 3.68E-02 |
| -1/2>  | 2.89E-02  | -6.70E-05 | 8.33E-02 |        | -1/2>  | -1.57E-01 | 1.44E-04  | 2.46E+00 |
| 1/2>   | 1.57E-01  | -2.95E-04 | 2.46E+00 |        | 1/2>   | 2.89E-02  | -1.30E-05 | 8.33E-02 |
| 3/2>   | 1.92E-03  | 3.68E-05  | 2.98E+00 |        | 3/2>   | -8.41E-02 | -3.60E-02 | 2.08E-01 |
| 5/2>   | -5.92E-02 | 9.70E-05  | 3.50E-01 |        | 5/2>   | -7.18E-02 | 2.70E-05  | 5.15E-01 |
| 7/2>   | 3.16E-02  | -6.30E-05 | 9.97E-02 |        | 7/2>   | -2.22E-01 | 1.59E-04  | 4.94E+00 |
| 9/2>   | 3.61E-02  | -5.60E-05 | 1.30E-01 |        | 9/2>   | 1.44E-02  | 9.00E-06  | 2.08E-02 |
| 11/2>  | -1.40E-02 | 1.40E-04  | 3.22E-01 |        | 11/2>  | -4.62E-01 | 1.01E-04  | 9.01E+01 |
| 13/2>  | 1.67E-02  | -2.50E-05 | 2.78E-02 |        | 13/2>  | -1.80E-02 | 1.80E-05  | 3.25E-02 |
| 15/2>  | 5.40E-05  | 0.00E+00  | 2.92E-07 |        | 15/2>  | 1.26E-02  | 0.00E+00  | 1.58E-02 |
| KD3-1  | Re        | Im        | %        |        | KD3-2  | Re        | Im        | %        |
| [mJ>   |           |           |          |        | [mJ>   |           |           |          |
| -15/2> | -8.10E-04 | 1.00E-06  | 6.56E-05 |        | -15/2> | -1.74E-02 | 2.70E-05  | 3.04E-02 |
| -13/2> | 2.94E-02  | -2.70E-05 | 8.67E-02 |        | -13/2> | 5.87E-02  | -9.90E-05 | 3.45E-01 |
| -11/2> | -1.73E-01 | 1.65E-04  | 2.98E+00 |        | -11/2> | 9.82E-02  | -1.21E-04 | 9.64E-01 |
| -9/2>  | -2.32E-01 | 8.50E-05  | 1.48E+00 |        | -9/2>  | 6.64E-01  | -5.99E-04 | 4.41E+01 |
| -7/2>  | -2.32E-01 | 1.86E-04  | 5.39E+00 |        | -7/2>  | 5.09E-02  | -7.60E-05 | 2.59E-01 |
| -5/2>  | -9.36E-02 | 6.10E-05  | 8.76E-01 |        | -5/2>  | -4.50E-01 | 5.49E-04  | 2.03E+01 |
| -3/2>  | 4.14E-01  | -2.27E-04 | 7.71E+01 |        | -3/2>  | -1.03E-01 | 1.03E-04  | 1.07E+00 |
| -1/2>  | 8.23E-02  | 1.20E-05  | 6.77E-01 |        | -1/2>  | 2.38E-04  | 1.88E-04  | 4.22E+00 |
| 1/2>   | -2.08E-01 | 8.10E-05  | 4.32E+00 |        | 1/2>   | 8.23E-02  | -8.50E-05 | 6.77E-01 |
| 3/2>   | -1.03E-01 | 5.40E-05  | 1.07E+00 |        | 3/2>   | -4.14E-01 | 4.10E-04  | 1.71E+01 |
| 5/2>   | 4.50E-01  | -1.44E-04 | 2.03E+01 |        | 5/2>   | -9.36E-02 | 8.30E-05  | 8.76E-01 |
| 7/2>   | 5.09E-02  | 5.00E-06  | 2.70E-01 |        | 7/2>   | 4.94E-01  | 1.71E-04  | 5.39E+00 |
| 9/2>   | -6.64E-01 | 6.30E-05  | 4.41E+01 |        | 9/2>   | 1.22E-01  | -1.02E-04 | 1.48E+00 |
| 11/2>  | 9.82E-02  | 3.00E-05  | 9.64E-01 |        | 11/2>  | 1.73E-01  | -1.00E-04 | 2.98E+00 |
| 13/2>  | -5.87E-02 | 8.00E-06  | 3.45E-01 |        | 13/2>  | 2.94E-02  | 1.80E-05  | 8.67E-02 |
| 15/2>  | -1.74E-02 | 0.00E+00  | 3.04E-02 |        | 15/2>  | 8.10E-04  | 0.00E+00  | 6.56E-05 |
| KD4-1  | Re        | Im        | %        |        | KD4-2  | Re        | Im        | %        |
| [mJ>   |           |           |          |        | [mJ>   |           |           |          |
| -15/2> | -2.19E-04 | 0.00E+00  | 4.80E-06 |        | -15/2> | 1.39E-02  | -1.00E-06 | 1.94E-02 |
| -13/2> | -3.34E-02 | 3.10E-05  | 1.12E-01 |        | -13/2> | 1.94E-03  | 4.00E-06  | 3.78E-04 |
| -11/2> | 1.48E-01  | -1.35E-04 | 2.19E+00 |        | -11/2> | 2.58E-02  | 1.30E-05  | 6.64E-02 |
| -9/2>  | -1.71E-02 | 1.60E-05  | 2.94E-02 |        | -9/2>  | -5.09E-01 | 5.20E-05  | 2.59E+01 |
| -7/2>  | -2.71E-01 | 2.25E-04  | 7.35E+00 |        | -7/2>  | 1.39E-01  | 1.01E-04  | 5.71E+00 |
| -5/2>  | 1.23E-01  | -2.09E-04 | 1.51E+00 |        | -5/2>  | -5.75E-02 | 1.53E-04  | 3.31E-01 |
| -3/2>  | -2.09E-01 | 1.93E-04  | 4.39E+00 |        | -3/2>  | 1.71E-01  | 2.11E-04  | 2.92E+00 |
| -1/2>  | -4.41E-01 | 2.02E-04  | 1.95E+01 |        | -1/2>  | 5.48E-01  | 1.88E-04  | 3.00E+01 |
| 1/2>   | -5.48E-01 | 2.41E-04  | 3.00E+01 |        | 1/2>   | -4.41E-01 | 1.60E-01  | 1.95E+01 |
| 3/2>   | -1.71E-01 | 2.28E-04  | 2.92E+00 |        | 3/2>   | -2.09E-01 | -1.73E-04 | 4.39E+00 |
| 5/2>   | -5.75E-02 | -1.47E-04 | 3.31E-01 |        | 5/2>   | -1.23E-01 | -1.98E-04 | 1.51E+00 |
| 7/2>   | 2.39E-01  | 7.80E-05  | 5.71E+00 |        | 7/2>   | 2.71E-01  | 1.99E-04  | 7.35E+00 |
| 9/2>   | -5.09E-01 | 2.00E-06  | 2.59E-01 |        | 9/2>   | 1.71E-02  | 1.80E-05  | 2.94E-02 |
| 11/2>  | -2.58E-02 | 1.60E-05  | 6.64E-02 |        | 11/2>  | 1.48E-01  | 1.21E-04  | 2.19E+00 |
| 13/2>  | 1.94E-03  | -5.00E-06 | 3.78E-04 |        | 13/2>  | 3.34E-02  | 2.80E-05  | 1.12E-01 |
| 15/2>  | -1.39E-02 | 0.00E+00  | 1.94E-02 |        | 15/2>  | -2.19E-04 | 0.00E+00  | 4.80E-06 |
| KD5-1  | Re        | Im        | %        |        | KD5-2  | Re        | Im        | %        |
| [mJ>   |           |           |          |        | [mJ>   |           |           |          |
| -15/2> | 1.02E-04  | 0.00E+00  | 1.04E-06 |        | -15/2> | -4.75E-03 | -8.00E-06 | 2.26E-03 |
| -13/2> | -4.00E-02 | 1.50E-05  | 1.59E-02 |        | -13/2> | -3.0E-02  | 6.19E-02  | 6.19E-02 |
| -11/2> | 9.09E-02  | 1.45E-04  | 8.26E-01 |        | -11/2> | 6.39E-02  | 1.12E-04  | 4.08E-01 |
| -9/2>  | -6.73E-02 | 1.01E-04  | 4.53E-01 |        | -9/2>  | 3.89E-01  | 9.37E-04  | 1.51E+01 |
| -7/2>  | 4.48E-01  | -6.72E-04 | 2.01E+01 |        | -7/2>  | 2.04E-01  | 4.76E-04  | 4.16E+00 |
| -5/2>  | -1.53E-01 | 1.57E-04  | 2.35E-01 |        | -5/2>  | 3.18E-01  | 1.80E-05  | 9.84E+00 |
| -3/2>  | -1.84E-01 | -2.11E-04 | 3.37E+00 |        | -3/2>  | 4.17E-01  | 1.45E-03  | 1.74E+01 |
| -1/2>  | 4.04E-01  | -5.55E-04 | 1.63E+01 |        | -1/2>  | 3.10E-01  | 8.40E-04  | 9.61E+00 |
| 1/2>   | -3.10E-01 | 3.03E-04  | 9.61E+00 |        | 1/2>   | 4.04E-01  | 1.26E-03  | 1.63E+01 |
| 3/2>   | -4.17E-01 | 2.74E-04  | 1.74E+01 |        | 3/2>   | 1.74E-01  | 1.07E-04  | 3.37E+00 |
| 5/2>   | -3.14E-01 | 6.31E-04  | 9.84E+00 |        | 5/2>   | -1.53E-01 | -4.23E-04 | 2.35E+00 |
| 7/2>   | 2.04E-01  | 1.23E-04  | 4.16E+00 |        | 7/2>   | -4.48E-01 | -1.45E-03 | 2.01E+01 |
| 9/2>   | -3.89E-01 | 2.63E-04  | 1.51E+01 |        | 9/2>   | -6.73E-02 | -1.60E-05 | 4.53E-01 |
| 11/2>  | 6.39E-02  | 1.00E-06  | 4.08E-01 |        | 11/2>  | -9.09E-02 | -3.02E-04 | 8.26E-01 |
| 13/2>  | -2.49E-02 | 1.00E-05  | 6.19E-02 |        | 13/2>  | -1.22E-02 | 5.00E-05  | 1.50E-02 |
| 15/2>  | -4.75E-03 | 0.00E+00  | 2.26E-03 |        | 15/2>  | -1.02E-04 | 0.00E+00  | 1.04E-06 |
| KD6-1  | Re        | Im        | %        |        | KD6-2  | Re        | Im        | %        |
| [mJ>   |           |           |          |        | [mJ>   |           |           |          |
| -15/2> | 3.40E-05  | 0.00E+00  | 1.16E-07 |        | -15/2> | 4.57E-03  | 3.40E-05  | 2.08E-03 |
| -13/2> | 1.58E-02  | -1.50E-05 | 2.50E-02 |        | -13/2> | -1.82E-02 | -1.19E-04 | 3.31E-02 |
| -11/2> | -4.20E-02 | 2.40E-05  | 1.76E-01 |        | -11/2> | -3.71E-02 | -2.57E-04 | 1.38E-01 |
| -9/2>  | 1.02E-01  | 9.10E-05  | 1.04E+00 |        | -9/2>  | -1.14E-02 | 6.90E-05  | 1.30E-02 |
| -7/2>  | -3.64E-01 | -2.40E-05 | 1.33E+01 |        | -7/2>  | 2.22E-01  | 1.55E-03  | 4.94E+00 |
| -5/2>  | -3.92E-01 | 7.70E-05  | 1.54E+01 |        | -5/2>  | 3.57E-01  | 2.77E-03  | 1.27E+01 |
| -3/2>  | 3.34E-01  | -1.87E-04 | 1.12E+01 |        | -3/2>  | -5.17E-01 | 4.00E-03  | 2.67E+01 |
| -1/2>  | -3.35E-01 | 1.98E-04  | 1.12E+01 |        | -1/2>  | -1.14E-01 | 1.14E-05  | 3.18E+00 |
| 1/2>   | 1.78E-01  | 1.63E-04  | 3.16E+00 |        | 1/2>   | -3.35E-01 | -2.15E-03 | 1.12E+01 |
| 3/2>   | 5.17E-01  | -2.07E-04 | 2.67E+01 |        | 3/2>   | -3.34E-01 | -2.64E-03 | 1.12E+01 |
| 5/2>   | -3.57E-01 | 1.47E-04  | 1.27E+01 |        | 5/2>   | -3.92E-01 | -2.96E-03 | 1.54E+01 |
| 7/2>   | -2.24E-01 | 2.40E-05  | 4.94E+00 |        | 7/2>   | 1.42E-01  | 2.65E-02  | 1.33E+00 |
| 9/2>   | 1.14E-02  | 1.50E-05  | 1.30E-02 |        | 9/2>   | 1.02E-01  | 8.41E-04  | 1.04     |

| KD0-1  | Re        | Im        | %        | NAFMIT | KD0-2  | Re        | Im        | %        |
|--------|-----------|-----------|----------|--------|--------|-----------|-----------|----------|
| ImJ>   |           |           |          |        | ImJ>   |           |           |          |
| -15/2> | 8.97E-01  | -4.41E-01 | 9.99E+01 |        | -15/2> | 0.00E+00  | 0.00E+00  | 0.00E+00 |
| -13/2> | 6.76E-04  | -1.78E-04 | 4.89E-05 |        | -13/2> | -1.40E-05 | -1.20E-05 | 3.40E-08 |
| -11/2> | 1.88E-03  | -1.46E-03 | 5.65E-04 |        | -11/2> | -2.00E-05 | -9.00E-06 | 4.81E-08 |
| -9/2>  | 8.03E-04  | -2.72E-04 | 3.42E-05 |        | -9/2>  | -1.63E-04 | -6.00E-06 | 2.66E-08 |
| -7/2>  | -2.43E-03 | 1.27E-02  | 1.66E-02 |        | -7/2>  | 8.90E-05  | -7.40E-05 | 1.34E-06 |
| -5/2>  | 3.17E-03  | -5.81E-03 | 4.38E-03 |        | -5/2>  | 3.76E-04  | -2.80E-04 | 2.20E-05 |
| -3/2>  | -4.01E-03 | -7.97E-03 | 7.96E-03 |        | -3/2>  | 6.73E-04  | -1.75E-04 | 4.84E-05 |
| -1/2>  | 3.75E-04  | 3.19E-04  | 2.42E-05 |        | -1/2>  | -4.26E-04 | 6.11E-04  | 5.55E-05 |
| 1/2>   | -6.52E-04 | -3.60E-04 | 5.5E-05  |        | 1/2>   | -1.96E-04 | 4.52E-04  | 2.3E-05  |
| 3/2>   | 6.81E-04  | 1.40E-04  | 4.83E-05 |        | 3/2>   | -8.40E-05 | 8.92E-03  | 7.96E-03 |
| 5/2>   | 4.61E-04  | 8.50E-05  | 2.20E-05 |        | 5/2>   | -5.41E-03 | -3.82E-03 | 4.38E-03 |
| 7/2>   | -1.12E-04 | -2.70E-05 | 1.33E-06 |        | 7/2>   | -7.78E-03 | -1.03E-02 | 1.66E-02 |
| 9/2>   | -1.49E-04 | 6.60E-05  | 2.66E-06 |        | 9/2>   | 1.77E-02  | -2.41E-02 | 7.42E-02 |
| 11/2>  | 1.30E-05  | -1.70E-05 | 4.58E-08 |        | 11/2>  | -1.04E-03 | 2.14E-03  | 5.65E-04 |
| 13/2>  | -7.00E-06 | 1.70E-05  | 3.38E-08 |        | 13/2>  | -6.85E-04 | 1.39E-04  | 4.89E-05 |
| 15/2>  | 0.00E+00  | 0.00E+00  | 0.00E+00 |        | 15/2>  | 9.99E-01  | 0.00E+00  | 9.99E+01 |
| KD1-1  | Re        | Im        | %        |        | KD1-2  | Re        | Im        | %        |
| ImJ>   |           |           |          |        | ImJ>   |           |           |          |
| -15/2> | -4.60E-05 | 6.50E-05  | 6.34E-07 |        | -15/2> | -1.72E-04 | 2.43E-04  | 8.86E-06 |
| -13/2> | 2.56E-01  | 2.26E-01  | 1.17E+01 |        | -13/2> | -7.03E-01 | -6.11E-01 | 8.68E+01 |
| -11/2> | 1.00E-02  | -9.78E-03 | 1.97E-02 |        | -11/2> | -2.97E-02 | 1.72E-02  | 1.18E-01 |
| -9/2>  | 2.17E-03  | -2.92E-03 | 1.32E-03 |        | -9/2>  | -4.99E-03 | 8.82E-03  | 1.03E-02 |
| -7/2>  | 2.50E-02  | 4.50E-02  | 8.0E-01  |        | -7/2>  | -2.28E-02 | 2.28E-02  | 3.31E-01 |
| -5/2>  | -1.59E-02 | 6.52E-03  | 2.95E-02 |        | -5/2>  | 4.51E-02  | -8.07E-03 | 2.10E-01 |
| -3/2>  | 7.18E-03  | -4.63E-03 | 7.29E-03 |        | -3/2>  | -3.78E-02 | -8.03E-03 | 1.50E-01 |
| -1/2>  | 1.84E-02  | -1.71E-02 | 6.30E-02 |        | -1/2>  | -4.84E-02 | -5.39E-02 | 5.25E-01 |
| 1/2>   | -7.19E-02 | -1.01E-03 | 1.03E-02 |        | 1/2>   | -2.46E-02 | -1.18E-03 | 2.99E-01 |
| 3/2>   | 1.53E-02  | -3.55E-02 | 1.50E-01 |        | 3/2>   | 7.92E-03  | -3.19E-03 | 7.29E-03 |
| 5/2>   | 3.26E-02  | -3.22E-02 | 2.10E-01 |        | 5/2>   | 1.45E-02  | -9.22E-03 | 2.95E-02 |
| 7/2>   | 4.91E-02  | -3.00E-02 | 3.31E-01 |        | 7/2>   | 1.73E-02  | -1.67E-02 | 5.80E-02 |
| 9/2>   | -1.01E-02 | 1.01E-03  | 8.4E-01  |        | 9/2>   | -3.64E-03 | 9.00E-05  | 1.32E-03 |
| 11/2>  | 3.12E-02  | -1.43E-02 | 1.18E-01 |        | 11/2>  | 1.38E-02  | -2.56E-03 | 1.97E-02 |
| 13/2>  | 9.32E-02  | 9.27E-01  | 8.68E+01 |        | 13/2>  | 3.69E-02  | 3.40E-01  | 1.17E+01 |
| 15/2>  | 2.98E-04  | 0.00E+00  | 8.88E-06 |        | 15/2>  | -7.90E-05 | 0.00E+00  | 6.24E-07 |
| KD2-1  | Re        | Im        | %        |        | KD2-2  | Re        | Im        | %        |
| ImJ>   |           |           |          |        | ImJ>   |           |           |          |
| -15/2> | 6.16E-04  | -3.05E-03 | 9.69E-04 |        | -15/2> | -3.04E-04 | 1.50E-03  | 2.35E-04 |
| -13/2> | 2.44E-02  | 2.53E-02  | 1.25E-01 |        | -13/2> | 3.17E-02  | 3.45E-02  | 2.33E-01 |
| -11/2> | 3.70E-02  | 4.56E-02  | 3.45E-01 |        | -11/2> | -7.99E-02 | -2.22E-02 | 6.87E-01 |
| -9/2>  | 4.03E-02  | 1.13E-02  | 1.75E-01 |        | -9/2>  | 2.64E-02  | -1.05E-02 | 1.09E-01 |
| -7/2>  | -3.86E-02 | -1.01E-02 | 1.59E-01 |        | -7/2>  | 3.02E-02  | -1.05E-02 | 1.02E-01 |
| -5/2>  | -2.79E-02 | 3.25E-02  | 8.4E-01  |        | -5/2>  | -5.94E-02 | -8.46E-02 | 5.99E-01 |
| -3/2>  | 1.10E-01  | 1.01E-01  | 2.24E+00 |        | -3/2>  | -1.58E-01 | -8.80E-02 | 3.26E+00 |
| -1/2>  | -4.37E-01 | 2.59E-01  | 2.58E+01 |        | -1/2>  | -6.54E-01 | 4.76E-01  | 6.54E+01 |
| 1/2>   | 5.96E-01  | -5.47E-01 | 6.54E+01 |        | 1/2>   | -3.40E-01 | 3.77E-01  | 2.58E+01 |
| 3/2>   | 3.51E-02  | 1.72E-01  | 3.66E+00 |        | 3/2>   | 1.24E-01  | 7.74E-02  | 1.24E-01 |
| 5/2>   | -4.96E-02 | -8.08E-02 | 8.99E-01 |        | 5/2>   | 2.64E-02  | 3.38E-02  | 1.84E-01 |
| 7/2>   | 1.62E-02  | -2.75E-02 | 1.02E-01 |        | 7/2>   | -2.21E-03 | -3.98E-02 | 1.59E-01 |
| 9/2>   | 1.42E-02  | 2.98E-02  | 1.09E-01 |        | 9/2>   | -3.13E-03 | -4.17E-02 | 1.75E-01 |
| 11/2>  | 3.90E-03  | 8.27E-02  | 6.87E-01 |        | 11/2>  | 8.74E-02  | 4.53E-02  | 8.9E-01  |
| 13/2>  | 4.52E-02  | 5.16E-02  | 4.71E-01 |        | 13/2>  | -2.02E-02 | -2.89E-02 | 1.25E-01 |
| 15/2>  | -1.54E-03 | 0.00E+00  | 2.36E-04 |        | 15/2>  | -3.11E-03 | 0.00E+00  | 9.69E-04 |
| KD3-1  | Re        | Im        | %        |        | KD3-2  | Re        | Im        | %        |
| ImJ>   |           |           |          |        | ImJ>   |           |           |          |
| -15/2> | -1.39E-03 | -4.58E-03 |          |        | -15/2> | 2.22E-03  | 7.31E-03  | 5.84E-03 |
| -13/2> | 1.28E-02  | 7.00E-03  | 2.14E-02 |        | -13/2> | 2.44E-02  | -2.71E-03 | 6.03E-02 |
| -11/2> | 6.75E-02  | 9.37E-03  | 4.65E-01 |        | -11/2> | 2.24E-01  | 6.58E-02  | 5.44E+00 |
| -9/2>  | 1.05E-01  | 2.23E-02  | 1.15E+00 |        | -9/2>  | 9.02E-02  | -4.12E-02 | 1.8E-01  |
| -7/2>  | 8.06E-02  | 2.42E-02  | 7.09E-01 |        | -7/2>  | -3.32E-02 | -6.98E-02 | 5.97E-01 |
| -5/2>  | 1.56E-01  | -1.30E-01 | 4.13E+00 |        | -5/2>  | -7.57E-02 | -8.65E-02 | 1.32E+00 |
| -3/2>  | -1.87E-01 | 9.55E-03  | 3.51E+00 |        | -3/2>  | -2.84E-01 | -5.71E-01 | 8.16E+01 |
| -1/2>  | 9.08E-02  | 5.14E-03  | 8.27E-01 |        | -1/2>  | -2.14E-01 | -8.8E-02  | 2.27E-01 |
| 1/2>   | 2.30E-02  | -9.03E-01 | 8.16E+01 |        | 1/2>   | -4.51E-02 | -1.82E-01 | 3.51E+00 |
| 3/2>   | 1.05E-01  | 4.73E-02  | 1.32E+00 |        | 3/2>   | 7.92E-02  | -1.87E-01 | 4.13E+00 |
| 5/2>   | -7.64E-02 | -1.13E-02 | 5.97E-01 |        | 5/2>   | -1.95E-04 | -8.42E-01 | 7.05E-01 |
| 7/2>   | 2.70E-02  | 3.06E-02  | 2.68E-01 |        | 7/2>   | 1.59E-02  | 1.59E-02  | 2.80E-01 |
| 9/2>   | 1.28E-01  | 1.95E-01  | 5.44E+00 |        | 9/2>   | 5.18E-02  | 9.40E-02  | 1.15E+00 |
| 11/2>  | -4.49E-03 | -2.42E-02 | 6.03E-02 |        | 11/2>  | 1.06E-02  | 6.73E-02  | 4.65E-01 |
| 13/2>  | 7.64E-03  | 0.00E+00  | 8.4E-03  |        | 13/2>  | 2.98E-03  | -1.43E-02 | 2.14E-02 |
| 15/2>  |           |           | 0.00E+00 |        | 15/2>  | 4.78E-03  | 0.00E+00  | 2.29E-03 |
| KD4-1  | Re        | Im        | %        |        | KD4-2  | Re        | Im        | %        |
| ImJ>   |           |           |          |        | ImJ>   |           |           |          |
| -15/2> | 9.20E-05  | -2.40E-05 | 9.04E-07 |        | -15/2> | 5.98E-03  | -1.55E-03 | 3.81E-03 |
| -13/2> | 5.07E-03  | -2.39E-02 | 5.98E-02 |        | -13/2> | 1.54E-02  | 2.81E-02  | 1.03E-01 |
| -11/2> | 2.80E-01  | 6.23E-02  | 8.22E+00 |        | -11/2> | -4.93E-01 | 5.32E-01  | 5.26E+01 |
| -9/2>  | 2.02E-02  | 2.21E-02  | 8.98E-02 |        | -9/2>  | -1.17E-02 | 1.40E-01  | 1.98E+00 |
| -7/2>  | 1.46E-01  | 1.10E-02  | 2.13E+00 |        | -7/2>  | -2.80E-02 | 2.17E-02  | 4.60E-01 |
| -5/2>  | 1.99E-01  | -1.98E-01 | 7.87E+00 |        | -5/2>  | 1.57E-01  | 4.34E-01  | 2.13E+01 |
| -3/2>  | 1.07E-01  | -5.23E-03 | 1.14E+00 |        | -3/2>  | -6.47E-02 | 1.42E-01  | 2.42E+00 |
| -1/2>  | 5.60E-02  | -5.43E-02 | 6.09E-01 |        | -1/2>  | -5.81E-02 | -7.74E-02 | 9.37E-01 |
| 1/2>   | -3.68E-02 | 8.95E-02  | 3.7E-01  |        | 1/2>   | -6.78E-02 | 3.86E-02  | 6.9E-01  |
| 3/2>   | 9.81E-02  | 1.21E-01  | 2.42E+00 |        | 3/2>   | 1.05E-01  | -2.17E-02 | 1.14E+00 |
| 5/2>   | 4.35E-02  | -4.60E-01 | 2.13E+01 |        | 5/2>   | -2.42E-01 | -1.42E-01 | 7.87E+00 |
| 7/2>   | -1.17E-02 | 6.68E-02  | 4.60E-01 |        | 7/2>   | 1.38E-01  | -4.71E-02 | 2.13E+00 |
| 9/2>   | -4.64E-02 | 1.33E-01  | 1.29E+01 |        | 9/2>   | 1.39E-02  | 2.95E-02  | 1.29E+00 |
| 11/2>  | 6.11E-01  | 3.92E-01  | 5.26E+01 |        | 11/2>  | 2.55E-01  | -1.30E-01 | 8.22E+00 |
| 13/2>  | 7.86E-03  | -3.10E-02 | 1.03E-01 |        | 13/2>  | -1.09E-02 | -2.19E-02 | 5.98E-02 |
| 15/2>  | -6.17E-03 | 0.00E+00  | 3.81E-03 |        | 15/2>  | 9.50E-05  | 0.00E+00  | 9.03E-07 |
| KD5-1  | Re        | Im        | %        |        | KD5-2  | Re        | Im        | %        |
| ImJ>   |           |           |          |        | ImJ>   |           |           |          |
| -15/2> | -2.74E-03 | -2.96E-03 | 1.63E-03 |        | -15/2> | 2.82E-04  | 3.05E-04  | 1.73E-05 |
| -13/2> | -1.20E-02 | 1.08E-02  | 2.72E-02 |        | -13/2> | 6.97E-04  | 2.12E-03  | 3.34E-04 |
| -11/2> | 1.76E-01  | -4.64E-01 | 2.46E+01 |        | -11/2> | 2.19E-01  | -1.56E-02 | 4.84E+00 |
| -9/2>  | 1.05E-01  | -8.18E-03 | 1.10E+00 |        | -9/2>  | -6.61E-02 | 2.98E-02  | 5.26E-01 |
| -7/2>  | -1.26E-01 | 3.54E-02  | 1.71E+00 |        | -7/2>  | -6.84E-02 | 2.17E-01  | 5.17E+00 |
| -5/2>  | -4.92E-01 | 4.95E-01  | 4.87E+01 |        | -5/2>  | -2.11E-01 | -2.97E-01 | 8.84E+00 |
| -3/2>  | -1.26E-01 | -1.14E-01 | 2.89E+00 |        | -3/2>  | 1.59E-03  | 2.16E-02  | 4.71E-02 |
| -1/2>  | -2.86E-02 | 4.49E-02  | 2.83E-01 |        | -1/2>  | -9.39E-02 | -3.59E-02 | 1.01E+00 |
| 1/2>   | 9.02E-02  | 4.46E-02  | 1.01E+00 |        | 1/2>   | 1.36E-02  | -5.14E-02 | 2.83E-01 |
| 3/2>   | 1.48E-02  | 1.59E-02  | 1.71E-01 |        | 3/2>   | 1.59E-02  | 1.71E-02  | 2.83E-01 |
| 5/2>   | -2.03E-01 | 2.17E-01  | 8.84E+00 |        | 5/2>   | 6.97E-01  | 2.54E-02  | 4.87E+01 |
| 7/2>   | 1.13E-01  | -1.97E-01 | 5.17E+00 |        | 7/2>   | 5.95E-02  | 1.16E-01  | 1.71E+00 |
| 9/2>   | 2.30E-02  | 6.88E-02  | 5.26E-01 |        | 9/2>   | -7.70E-02 | -7.13E-02 | 1.10E+00 |
| 11/2>  | 1.37E-01  | 1.72E-01  | 4.84E+00 |        | 11/2>  | 2.21E-01  | -4.44E-01 | 2.46E+01 |
| 13/2>  | -2.5E-03  | 1.13E-03  | 6.33E-04 |        | 13/2>  | 2.91E-02  | -4.33E-02 | 2.72E-01 |
| 15/2>  | 4.16E-04  | 0.00E+00  | 1.73E-05 |        | 15/2>  | 4.03E-03  | 0.00E+00  | 1.63E-03 |
| KD6-1  | Re        | Im        | %        |        | KD6-2  | Re        | Im        | %        |
| ImJ>   |           |           |          |        | ImJ>   |           |           |          |
| -15/2> | 1.84E-02  | -5.09E-03 | 3.64E-02 |        | -15/2> | 4.00E-06  | -1.00E-06 | 1.70E-09 |
| -13/2> | 2.95E-02  | -3.74E-02 | 2.27E-01 |        | -13/2> | -6.40E-03 | 2.38E-02  | 6.09E-02 |
| -11/2> | 6.80E-02  | -1.22E-01 | 1.96E+00 |        | -11/2> | 8.36E-03  | -4.34E-03 | 8.87E-03 |
| -9/2>  | 1.80E-01  | 5.51E-01  | 3.36E+01 |        | -9/2>  | -1.12E-02 | -5.13E-02 | 1.32E+00 |
| -7/2>  | 6.96E-01  | -8.47E-02 | 4.91E+01 |        | -7/2>  | -1.74E-01 | -1.09E-01 | 4.21E+00 |
| -5/2>  | -8.98E-02 | 1.75E-01  | 3.89E+00 |        | -5/2>  | 7.13E-02  | 1.77E-01  | 3.64E+00 |
| -3/2>  | -7.53E-02 | 2.24E-02  | 6.17E-01 |        | -3/2>  | -6.87E-02 | -4.07E-02 | 6.38E-01 |
| -1/2>  | 1.93E-02  | 9.30E-03  | 8.89E-02 |        | -1/2>  | 4.49E-02  | 3.83E-02  | 3.65E-01 |
| 1/2>   | 3.48E-02  | -4.94E-02 | 3.65E-01 |        | 1/2>   | 2.12E-02  | -1.55E-02 | 6.89E-02 |
| 3/2>   | -5.54E-02 | 5.75E-02  | 6.38E-01 |        | 3/2>   | 7.86E-02  | 1.48E-03  | 6.17E-01 |
| 5/2>   | -2.15E-02 | 1.90E-01  | 3.64E+00 |        | 5/2>   | -1.33E-01 | -1.45E-01 | 3.89E+00 |
| 7/2>   | -1.38E-01 | 1.52E-01  | 4.87E+00 |        | 7/2>   | -9.93E-02 | -2.47E-02 | 2.91E+01 |
| 9/2>   | 9.44E-02  | -7.94E-02 | 1.52E+00 |        | 9/2>   | 2.60E-02  | -5        |          |
